# Supplementary material for: Design, Synthesis, and Evaluation of New Hybrid Derivatives of 5,6-Dihydro-4H-pyrrolo[3,2,1-ij]quinolin-2(1H)-one as Potential Dual Inhibitors of Blood Coagulation Factors Xa and XIa
Source: MDPI journal article supplement (doi:10.3390/molecules29020373), 2024-01-11
Supplement: s1 [file s1]

# Design, synthesis and evaluation of new hybrid derivatives of 5,6-dihydro-4*H*-pyrrolo[3,2,1-*ij*]quinolin-2(1*H*)-one as potential dual inhibitors of blood coagulation factors Xa and XIa

Anna A. Skoptsova <sup>1</sup>, Athina Geronikaki <sup>2</sup>, Nadezhda P. Novichikhina <sup>1</sup>, Alexey V. Sulimov <sup>3</sup>, Ivan S. Ilin <sup>3</sup>, Vladimir B. Sulimov <sup>3</sup>, Georgii A. Bykov <sup>4</sup>, Nadezhda A. Podoplelova <sup>5</sup>, Oleg V. Pyankov <sup>6</sup> and Khidmet S. Shikhaliev<sup>1</sup>

<sup>1</sup> Department of Organic Chemistry, Faculty of Chemistry, Voronezh State University, 1 Universitetskaya Sq., 394018 Voronezh, Russia

<sup>2</sup> School of Pharmacy, Aristotle University of Thessaloniki, 54124 Thessaloniki, Greece

<sup>3</sup> Research Computing Center, Lomonosov Moscow State University, 119992 Moscow, Russia

<sup>4</sup> Department of Biophysics at the Faculty of Physics, Lomonosov Moscow State University, 119992 Moscow, Russia

<sup>5</sup> Center for Theoretical Problems of Physicochemical Pharmacology, 119991 Moscow, Russia

<sup>6</sup> State Research Center of Virology and Biotechnology "Vector", 630559 Koltsovo, Russia;

\* Correspondence: geronik@pharm.auth.gr (A.G.); shikh1961@yandex.ru (K.S.S.)

## Contents.

|                                                                                                                                                                                                                                                                                  |     |
|----------------------------------------------------------------------------------------------------------------------------------------------------------------------------------------------------------------------------------------------------------------------------------|-----|
| Copies of spectral data of synthesized compounds.....                                                                                                                                                                                                                            | S4  |
| <sup>1</sup> H, <sup>13</sup> C NMR and data HPLC-HRMS-ESI spectra of methyl (Z)-2-(4-oxo-2-(2-((Z)-4,4,6-trimethyl-2-oxo-5,6-dihydro-4 <i>H</i> -pyrrolo[3,2,1- <i>ij</i> ]quinolin-1(2 <i>H</i> )-ylidene)hydrazineyl)thiazol-5(4 <i>H</i> )-ylidene)acetate 3a.....           | S4  |
| <sup>1</sup> H, <sup>13</sup> C NMR and data HPLC-HRMS-ESI spectra of methyl (Z)-2-(2-(2-((Z)-8-methoxy-4,4,6-trimethyl-2-oxo-5,6-dihydro-4 <i>H</i> -pyrrolo[3,2,1- <i>ij</i> ]quinolin-1(2 <i>H</i> )-ylidene)hydrazineyl)-4-oxothiazol-5(4 <i>H</i> )-ylidene)acetate 3b..... | S6  |
| <sup>1</sup> H, <sup>13</sup> C NMR and data HPLC-HRMS-ESI spectra of methyl (Z)-2-(2-(2-((Z)-8-chloro-4,4,6-trimethyl-2-oxo-5,6-dihydro-4 <i>H</i> -pyrrolo[3,2,1- <i>ij</i> ]quinolin-1(2 <i>H</i> )-ylidene)hydrazineyl)-4-oxothiazol-5(4 <i>H</i> )-ylidene)acetate 3c ..... | S8  |
| <sup>1</sup> H, <sup>13</sup> C NMR and data HPLC-HRMS-ESI spectra of methyl (Z)-2-(2-(2-((Z)-8-bromo-4,4,6-trimethyl-2-oxo-5,6-dihydro-4 <i>H</i> -pyrrolo[3,2,1- <i>ij</i> ]quinolin-1(2 <i>H</i> )-ylidene)hydrazineyl)-4-oxothiazol-5(4 <i>H</i> )-ylidene)acetate 3d.....   | S10 |
| <sup>1</sup> H, <sup>13</sup> C NMR and data HPLC-HRMS-ESI spectra of methyl 2-(2-(2-(8-iodo-4,4,6-trimethyl-2-oxo-5,6-dihydro-4 <i>H</i> -pyrrolo[3,2,1- <i>ij</i> ]quinolin-1(2 <i>H</i> )-ylidene)hydrazineyl)-4-oxothiazol-5(4 <i>H</i> )-ylidene)acetate 3e .....           | S12 |

|                                                                                                                                                                                                                                                                                                     |     |
|-----------------------------------------------------------------------------------------------------------------------------------------------------------------------------------------------------------------------------------------------------------------------------------------------------|-----|
| <sup>1</sup> H, <sup>13</sup> C NMR and data HPLC-HRMS-ESI spectra of methyl (Z)-2-(4-oxo-2-(2-((Z)-4,4,6,8,9-pentamethyl-2-oxo-5,6-dihydro-4 <i>H</i> -pyrrolo[3,2,1- <i>ij</i> ]quinolin-1(2 <i>H</i> )-ylidene)hydrazineyl)thiazol-5(4 <i>H</i> )-ylidene)acetate 3f .....                       | S14 |
| <sup>1</sup> H, <sup>13</sup> C NMR and data HPLC-HRMS-ESI spectra of methyl (Z)-2-(2-(2-(8-chloro-4,4,6,9-tetramethyl-2-oxo-5,6-dihydro-4 <i>H</i> -pyrrolo[3,2,1- <i>ij</i> ]quinolin-1(2 <i>H</i> )-ylidene)hydrazineyl)-4-oxothiazol-5(4 <i>H</i> )-ylidene)acetate 3g .....                    | S16 |
| <sup>1</sup> H, <sup>13</sup> C NMR and data HPLC-HRMS-ESI spectra of methyl (Z)-2-(2-(2-(8-bromo-4,4,6,9-tetramethyl-2-oxo-5,6-dihydro-4 <i>H</i> -pyrrolo[3,2,1- <i>ij</i> ]quinolin-1(2 <i>H</i> )-ylidene)hydrazineyl)-4-oxothiazol-5(4 <i>H</i> )-ylidene)acetate 3h .....                     | S18 |
| <sup>1</sup> H, <sup>13</sup> C NMR and data HPLC-HRMS-ESI spectra of methyl (Z)-2-(2-(2-((Z)-6-(4-chlorophenyl)-4,4,6-trimethyl-2-oxo-5,6-dihydro-4 <i>H</i> -pyrrolo[3,2,1- <i>ij</i> ]quinolin-1(2 <i>H</i> )-ylidene)hydrazineyl)-4-oxothiazol-5(4 <i>H</i> )-ylidene)acetate 3i .....          | S20 |
| <sup>1</sup> H, <sup>13</sup> C NMR and data HPLC-HRMS-ESI spectra of methyl 2-(2-(2-(6-(4-chlorophenyl)-4,4,6,8-tetramethyl-2-oxo-5,6-dihydro-4 <i>H</i> -pyrrolo[3,2,1- <i>ij</i> ]quinolin-1(2 <i>H</i> )-ylidene)hydrazineyl)-4-oxothiazol-5(4 <i>H</i> )-ylidene)acetate 3j .....              | S22 |
| <sup>1</sup> H, <sup>13</sup> C NMR and data HPLC-HRMS-ESI spectra of methyl (Z)-2-(2-(2-((Z)-8-chloro-6-(4-chlorophenyl)-4,4,6-trimethyl-2-oxo-5,6-dihydro-4 <i>H</i> -pyrrolo[3,2,1- <i>ij</i> ]quinolin-1(2 <i>H</i> )-ylidene)hydrazineyl)-4-oxothiazol-5(4 <i>H</i> )-ylidene)acetate 3k ..... | S24 |
| <sup>1</sup> H, <sup>13</sup> C NMR and data HPLC-HRMS-ESI spectra of methyl (Z)-2-(2-(2-((Z)-8-bromo-6-(4-chlorophenyl)-4,4,6-trimethyl-2-oxo-5,6-dihydro-4 <i>H</i> -pyrrolo[3,2,1- <i>ij</i> ]quinolin-1(2 <i>H</i> )-ylidene)hydrazineyl)-4-oxothiazol-5(4 <i>H</i> )-ylidene)acetate 3l .....  | S26 |
| <sup>1</sup> H, <sup>13</sup> C NMR and data HPLC-HRMS-ESI spectra of methyl 2-(2-(2-(6-(4-chlorophenyl)-8-fluoro-4,4,6-trimethyl-2-oxo-5,6-dihydro-4 <i>H</i> -pyrrolo[3,2,1- <i>ij</i> ]quinolin-1(2 <i>H</i> )-ylidene)hydrazineyl)-4-oxothiazol-5(4 <i>H</i> )-ylidene)acetate 3m .....         | S28 |
| <sup>1</sup> H, <sup>13</sup> C NMR and data HPLC-HRMS-ESI spectra of methyl (Z)-2-(4-oxo-2-(2-((Z)-4,4,6-trimethyl-2-oxo-6-phenyl-5,6-dihydro-4 <i>H</i> -pyrrolo[3,2,1- <i>ij</i> ]quinolin-1(2 <i>H</i> )-ylidene)hydrazineyl)thiazol-5(4 <i>H</i> )-ylidene)acetate 3n .....                    | S30 |
| <sup>1</sup> H, <sup>13</sup> C NMR and data HPLC-HRMS-ESI spectra of methyl (Z)-2-(2-(2-((Z)-8-chloro-4,4,6-trimethyl-2-oxo-6-phenyl-5,6-dihydro-4 <i>H</i> -pyrrolo[3,2,1- <i>ij</i> ]quinolin-1(2 <i>H</i> )-ylidene)hydrazineyl)-4-oxothiazol-5(4 <i>H</i> )-ylidene)acetate 3o .....           | S32 |
| <sup>1</sup> H, <sup>13</sup> C NMR and data HPLC-HRMS-ESI spectra of methyl (Z)-2-(2-(2-((Z)-8-bromo-4,4,6-trimethyl-2-oxo-6-phenyl-5,6-dihydro-4 <i>H</i> -pyrrolo[3,2,1- <i>ij</i> ]quinolin-1(2 <i>H</i> )-ylidene)hydrazineyl)-4-oxothiazol-5(4 <i>H</i> )-ylidene)acetate 3p .....            | S34 |

|                                                                                                                                                                                                                                                                                          |     |
|------------------------------------------------------------------------------------------------------------------------------------------------------------------------------------------------------------------------------------------------------------------------------------------|-----|
| <sup>1</sup> H, <sup>13</sup> C NMR and data HPLC-HRMS-ESI spectra of methyl (Z)-2-(2-(2-((Z)-8-fluoro-4,4,6-trimethyl-2-oxo-6-phenyl-5,6-dihydro-4 <i>H</i> -pyrrolo[3,2,1- <i>ij</i> ]quinolin-1(2 <i>H</i> )-ylidene)hydrazineyl)-4-oxothiazol-5(4 <i>H</i> )-ylidene)acetate 3q..... | S36 |
| The dependence of inhibition of factor Xa- and XIa-induced chromogenic substrate hydrolysis on the compound concentration. ....                                                                                                                                                          | S38 |
| The dependence of inhibition of factor Xa- and XIa-induced chromogenic substrate hydrolysis on the concentration of 3b .....                                                                                                                                                             | S38 |
| The dependence of inhibition of factor Xa- and XIa-induced chromogenic substrate hydrolysis on the concentration of 3c.....                                                                                                                                                              | S39 |
| The dependence of inhibition of factor Xa- and XIa-induced chromogenic substrate hydrolysis on the concentration of 3e.....                                                                                                                                                              | S40 |
| The dependence of inhibition of factor Xa- and XIa-induced chromogenic substrate hydrolysis on the concentration of 3f.....                                                                                                                                                              | S41 |
| The dependence of inhibition of factor Xa- and XIa-induced chromogenic substrate hydrolysis on the concentration of 3k .....                                                                                                                                                             | S42 |
| The dependence of inhibition of factor Xa- and XIa-induced chromogenic substrate hydrolysis on the concentration of 3l .....                                                                                                                                                             | S43 |
| The dependence of inhibition of factor Xa- and XIa-induced chromogenic substrate hydrolysis on the concentration of 3n .....                                                                                                                                                             | S44 |
| The dependence of inhibition of factor Xa- and XIa-induced chromogenic substrate hydrolysis on the concentration of 3o .....                                                                                                                                                             | S45 |
| The dependence of inhibition of factor Xa- and XIa-induced chromogenic substrate hydrolysis on the concentration of 3p .....                                                                                                                                                             | S46 |
| LCMS analysis of the reaction mass after 1 h of interaction of compound 1b with thiosemicarbazide to obtain 2b.....                                                                                                                                                                      | S47 |

**<sup>1</sup>H, <sup>13</sup>C NMR and data HPLC-HRMS-ESI spectra of methyl (Z)-2-(4-oxo-2-(2-((Z)-4,4,6-trimethyl-2-oxo-5,6-dihydro-4*H*-pyrrolo[3,2,1-*ij*]quinolin-1(2*H*)-ylidene)hydrazineyl)thiazol-5(4*H*)-ylidene)acetate 3a**

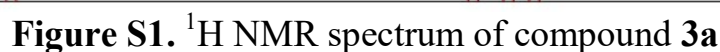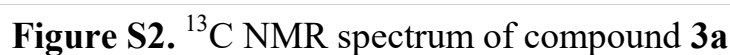

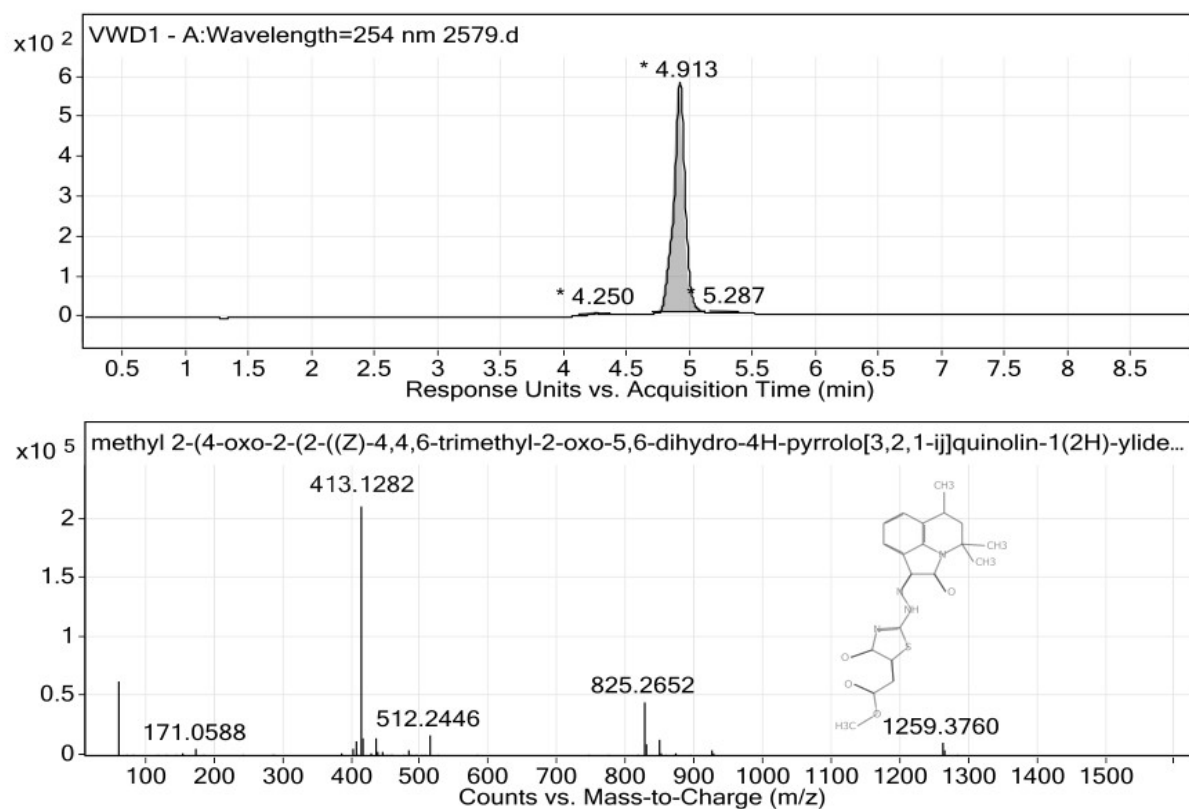

**Figure S3.** Data of HPLC-MS-ESI analysis of **3a**

[illegible]

Chemical shift (ppm): 165.750, 156.341, 155.525, 147.482, 142.077, 134.850, 126.561, 118.326, 116.144, 115.608, 115.303, 111.987, 103.960, 55.745, 53.566, 52.509, 51.739, 49.733, 48.133, 40.094, 39.524, 39.885, 39.672, 39.677, 39.506, 39.469, 38.297, 38.260, 38.088, 39.052, 38.880, 38.444, 38.444, 25.528, 23.814, 17.969.

Chemical structure: COc1ccc2c(c1)c3c(c2)c(=O)[nH]c3N=C4C(=O)N(C)C(C)C4C5=CC(=O)SC5=CC(=O)OC

Chemical shift (ppm): 165.750, 156.341, 155.525, 147.482, 142.077, 134.850, 126.561, 118.326, 116.144, 115.608, 115.303, 111.987, 103.960, 55.745, 53.566, 52.509, 51.739, 49.733, 48.133, 40.094, 39.524, 39.885, 39.672, 39.677, 39.506, 39.469, 38.297, 38.260, 38.088, 39.052, 38.880, 38.444, 38.444, 25.528, 23.814, 17.969.

S6

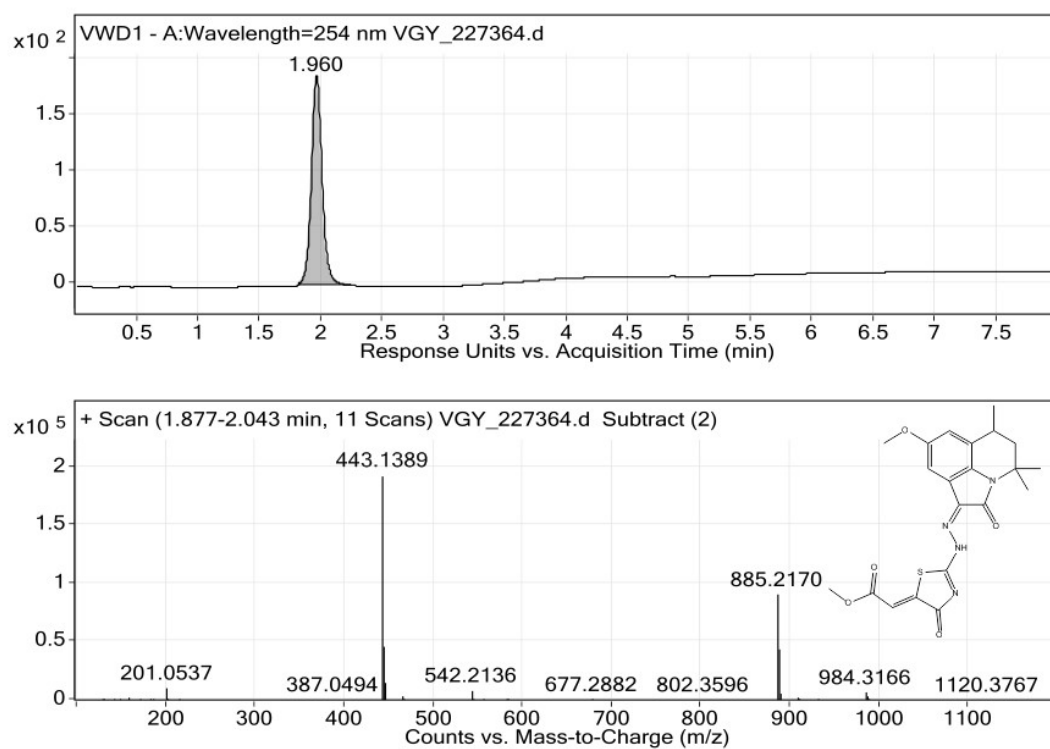

**Figure S6.** Data of HPLC-MS-ESI analysis of **3b**

**$^1\text{H}$ ,  $^{13}\text{C}$  NMR and data HPLC-HRMS-ESI spectra of methyl (Z)-2-(2-((Z)-8-chloro-4,4,6-trimethyl-2-oxo-5,6-dihydro-4*H*-pyrrolo[3,2,1-*ij*]quinolin-1(2*H*)-ylidene)hydrazineyl)-4-oxothiazol-5(4*H*)-ylidene)acetate **3c****

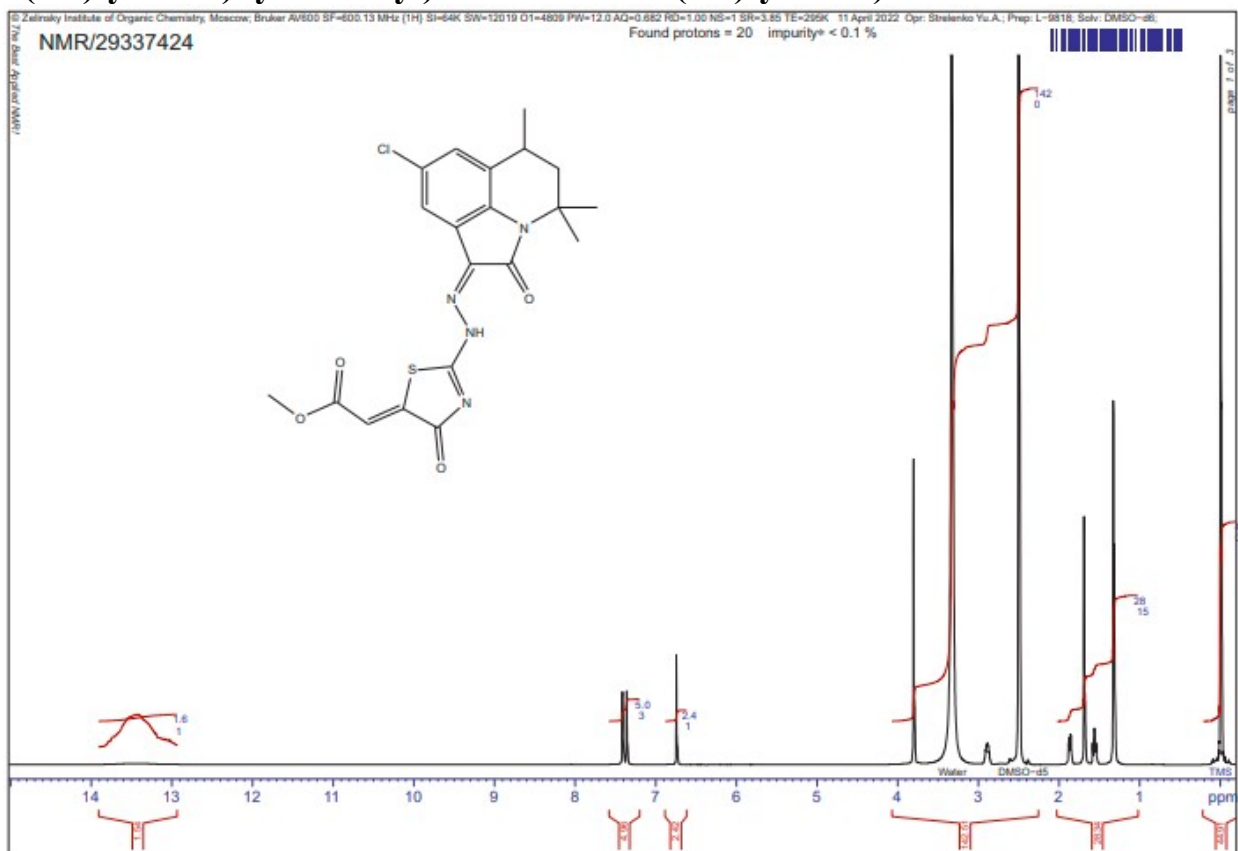

**Figure S7.**  $^1\text{H}$  NMR spectrum of compound **3c**

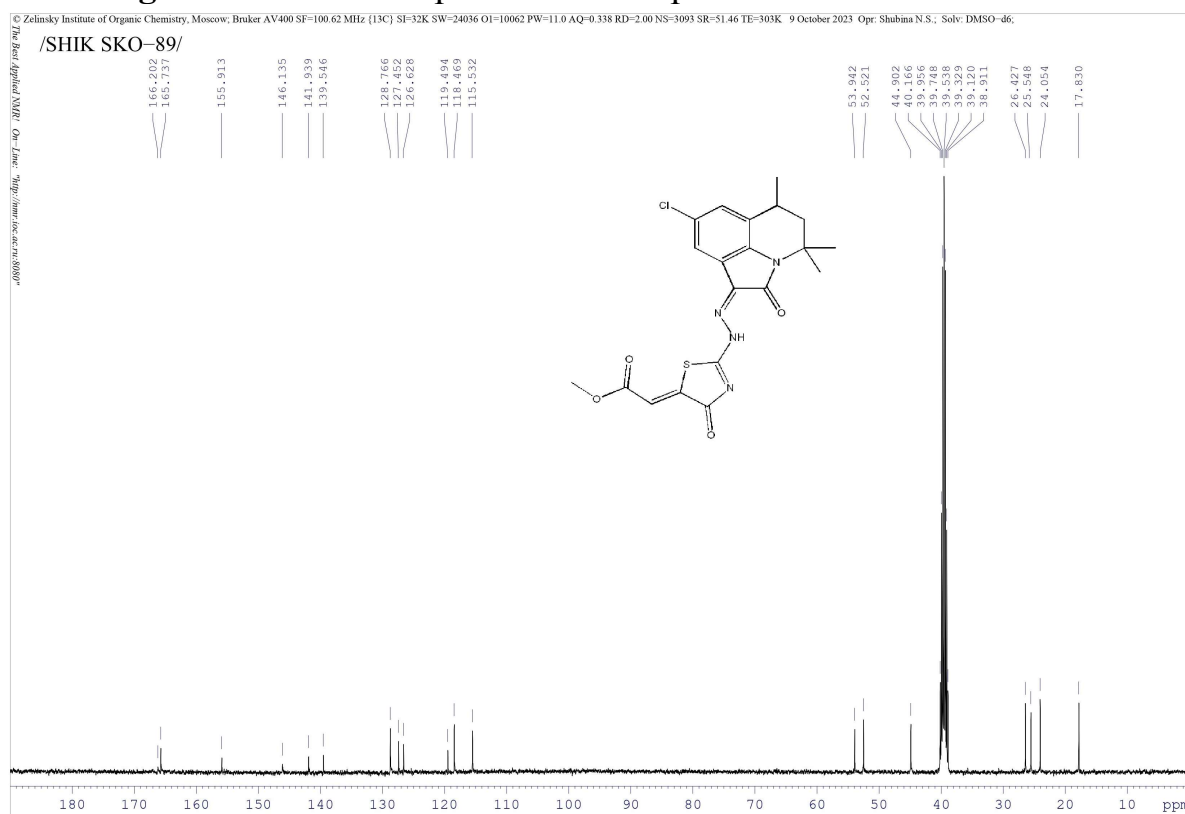

**Figure S8.**  $^{13}\text{C}$  NMR spectrum of compound **3c**





**$^1\text{H}$ ,  $^{13}\text{C}$  NMR and data HPLC-HRMS-ESI spectra of methyl (Z)-2-(2-(2-((Z)-8-bromo-4,4,6-trimethyl-2-oxo-5,6-dihydro-4*H*-pyrrolo[3,2,1-*ij*]quinolin-1(2*H*)-ylidene)hydrazineyl)-4-oxothiazol-5(4*H*)-ylidene)acetate **3d****

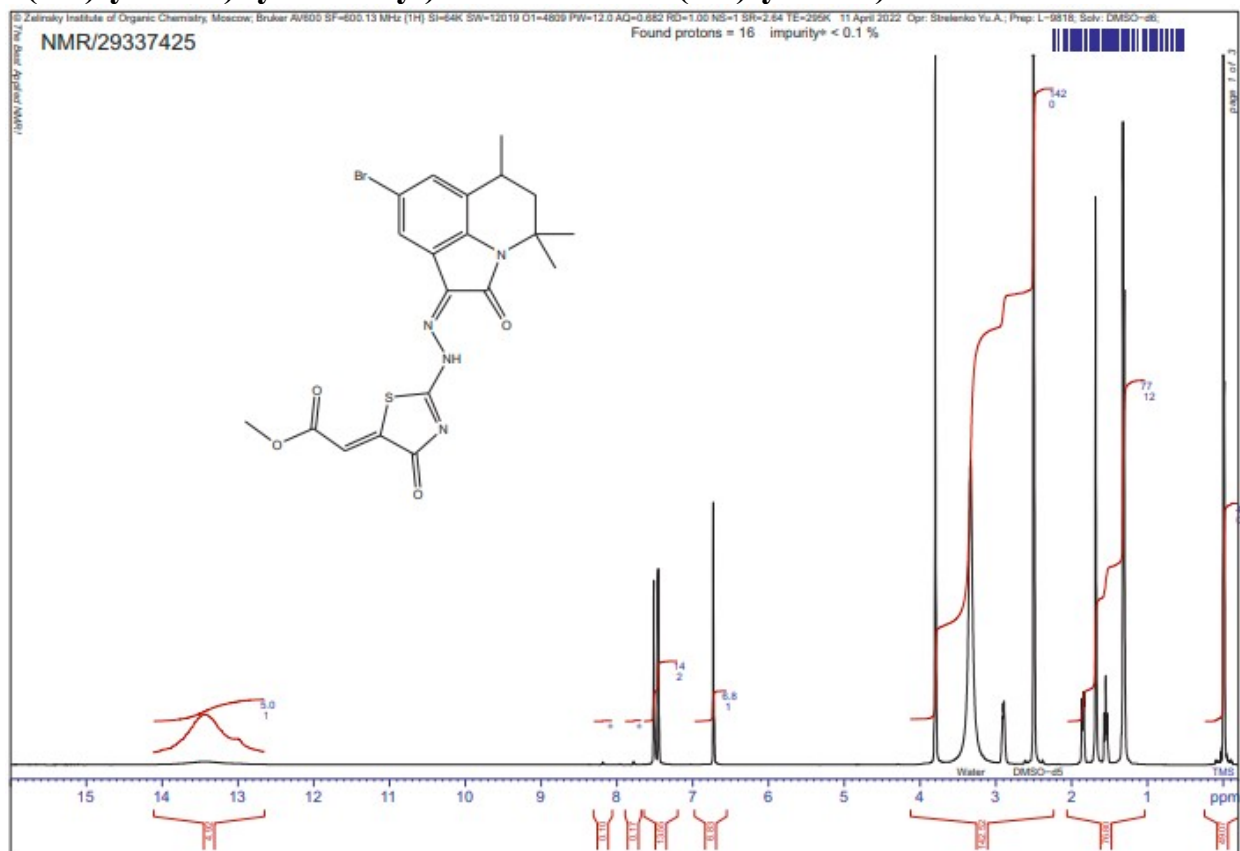

**Figure S10.**  $^1\text{H}$  NMR spectrum of compound **3d**

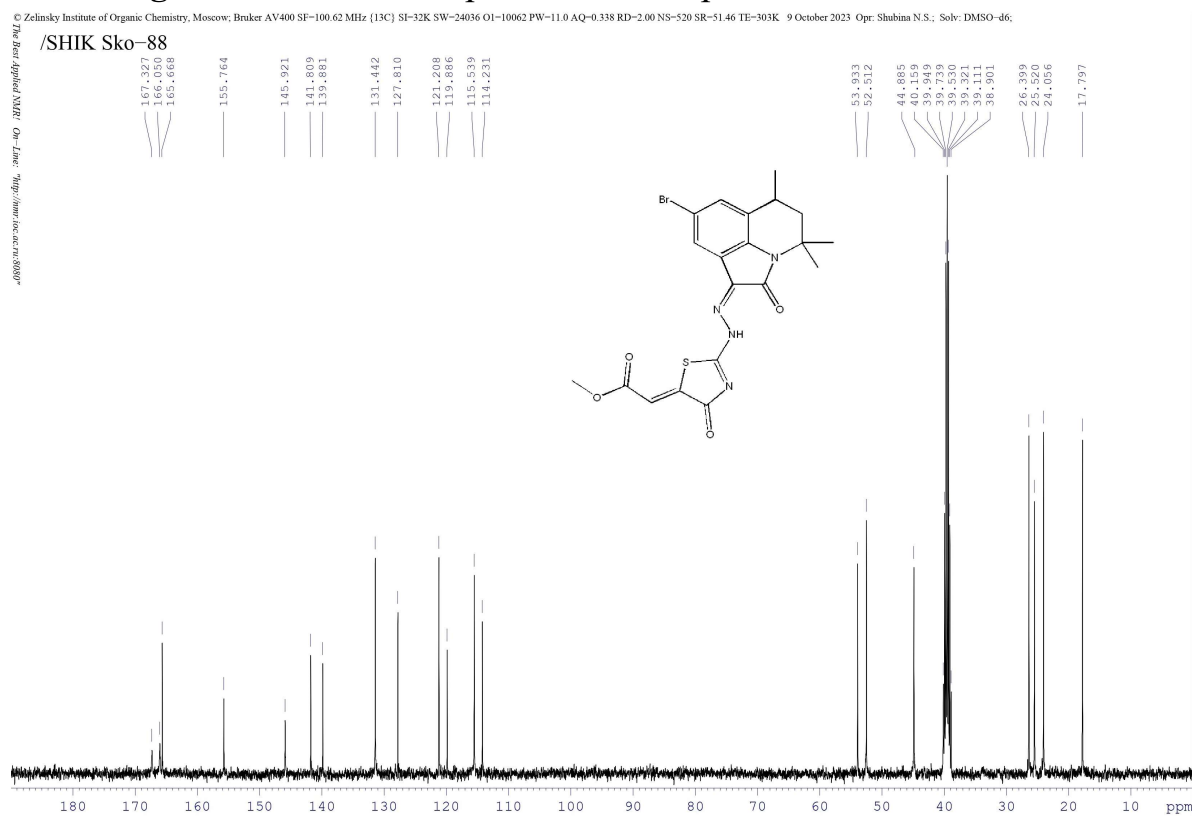

**Figure S11.**  $^{13}\text{C}$  NMR spectrum of compound **3d**

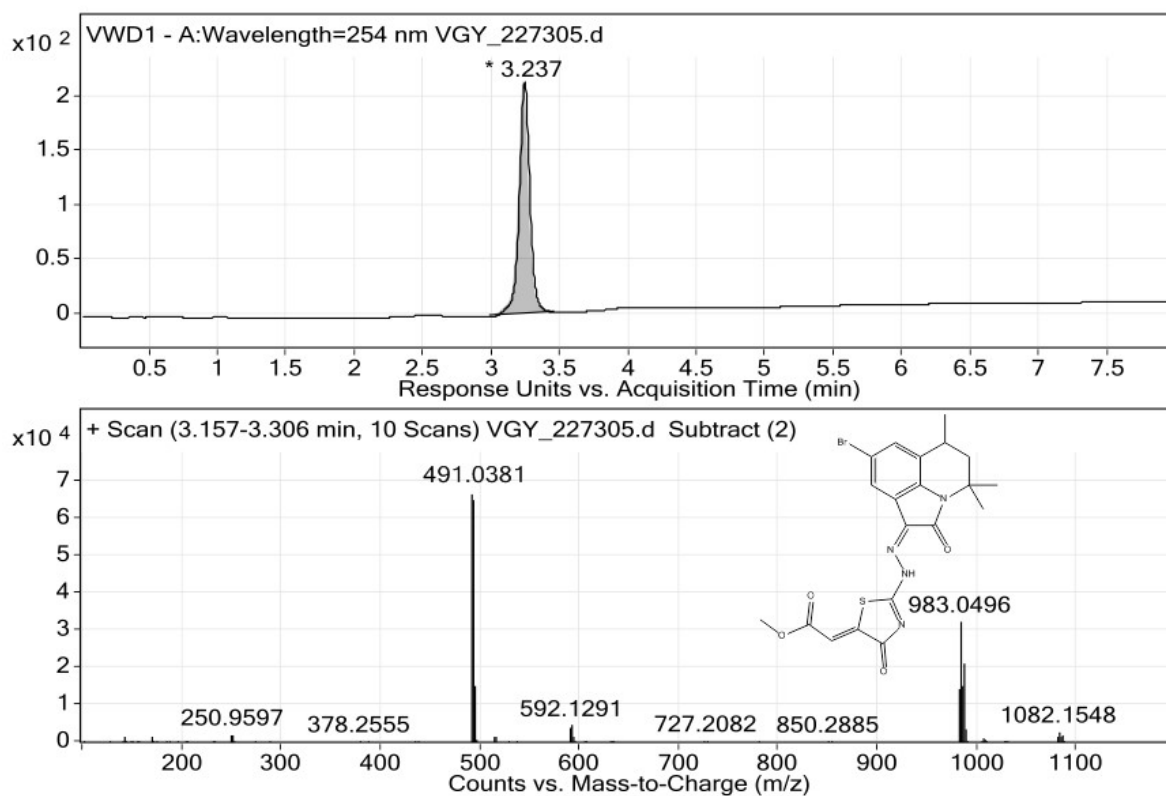

**Figure S12.** Data of HPLC-MS-ESI analysis of **3d**

**$^1\text{H}$ ,  $^{13}\text{C}$  NMR and data HPLC-HRMS-ESI spectra of methyl 2-(2-(2-(8-iodo-4,4,6-trimethyl-2-oxo-5,6-dihydro-4*H*-pyrrolo[3,2,1-*ij*]quinolin-1(2*H*)-ylidene)hydrazineyl)-4-oxothiazol-5(4*H*)-ylidene)acetate **3e****

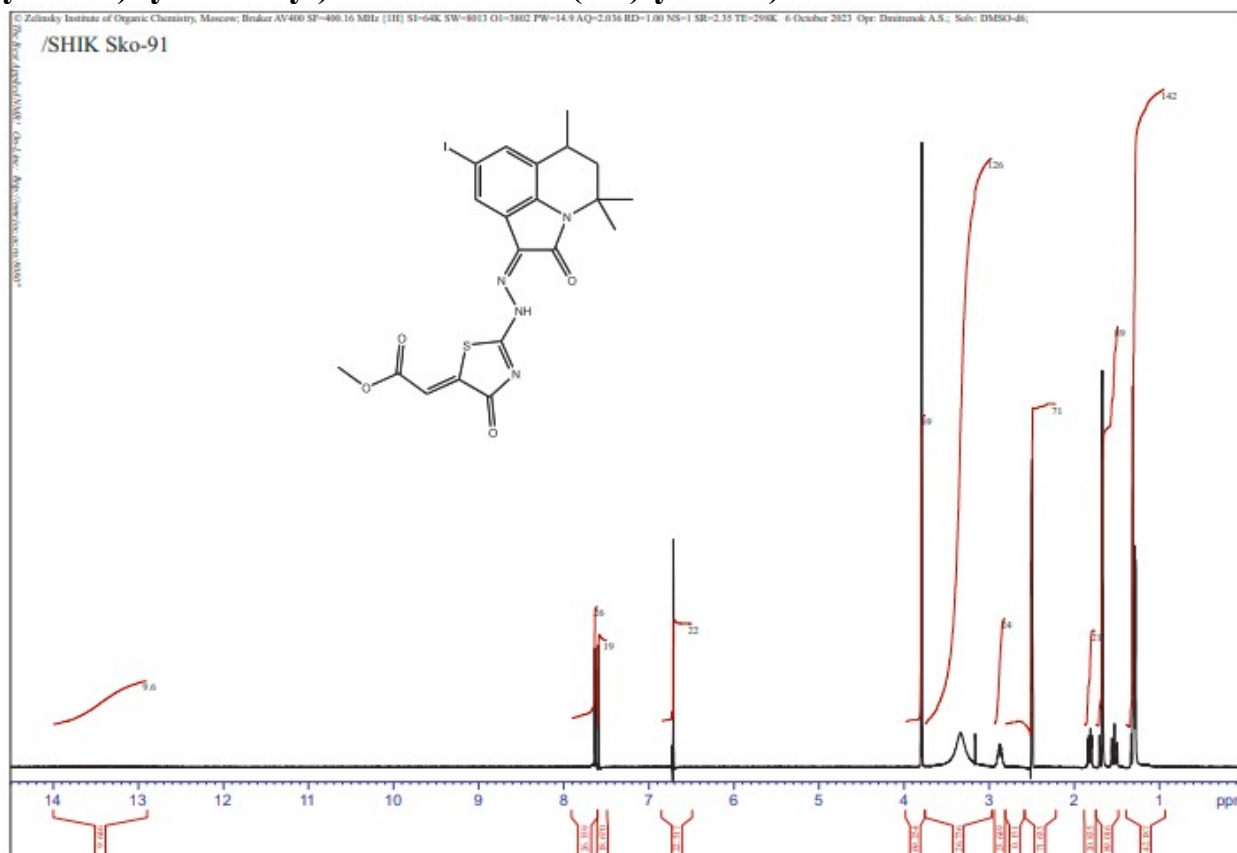

**Figure S13.**  $^1\text{H}$  NMR spectrum of compound **3e**

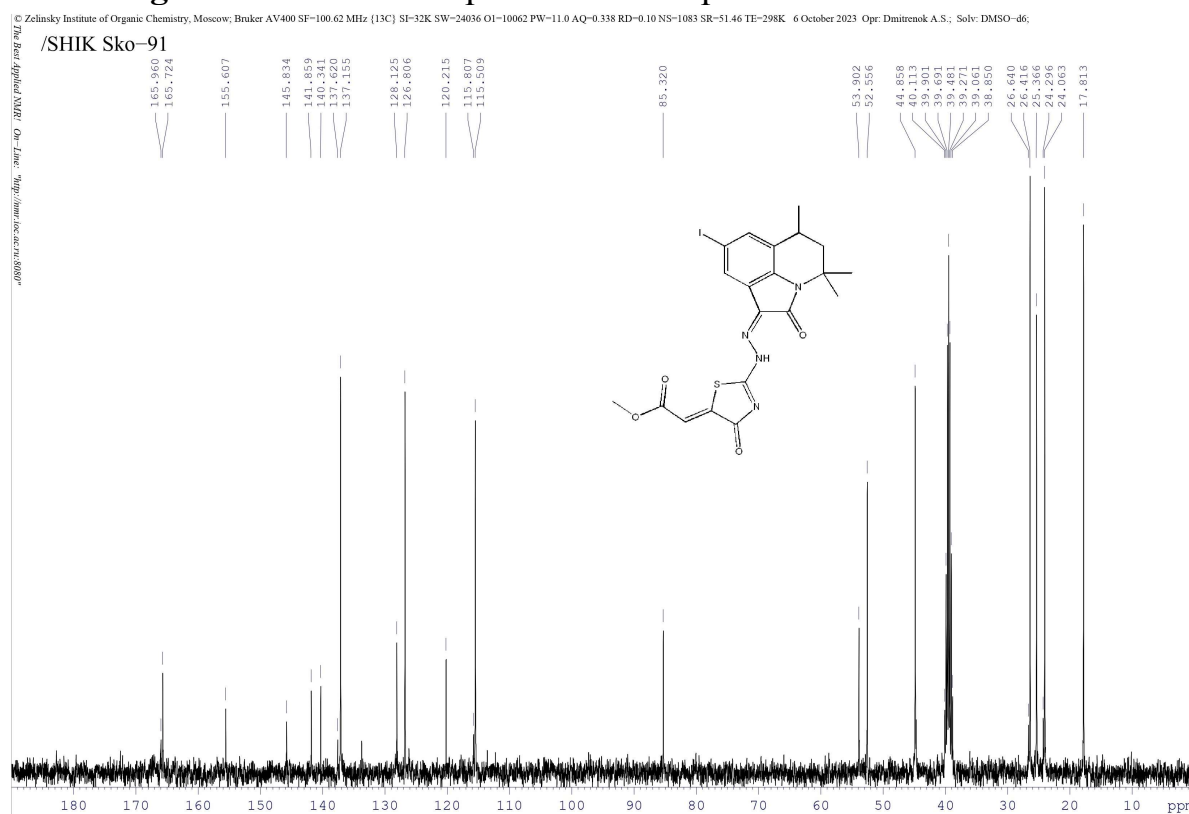

**Figure S14.**  $^{13}\text{C}$  NMR spectrum of compound **3e**

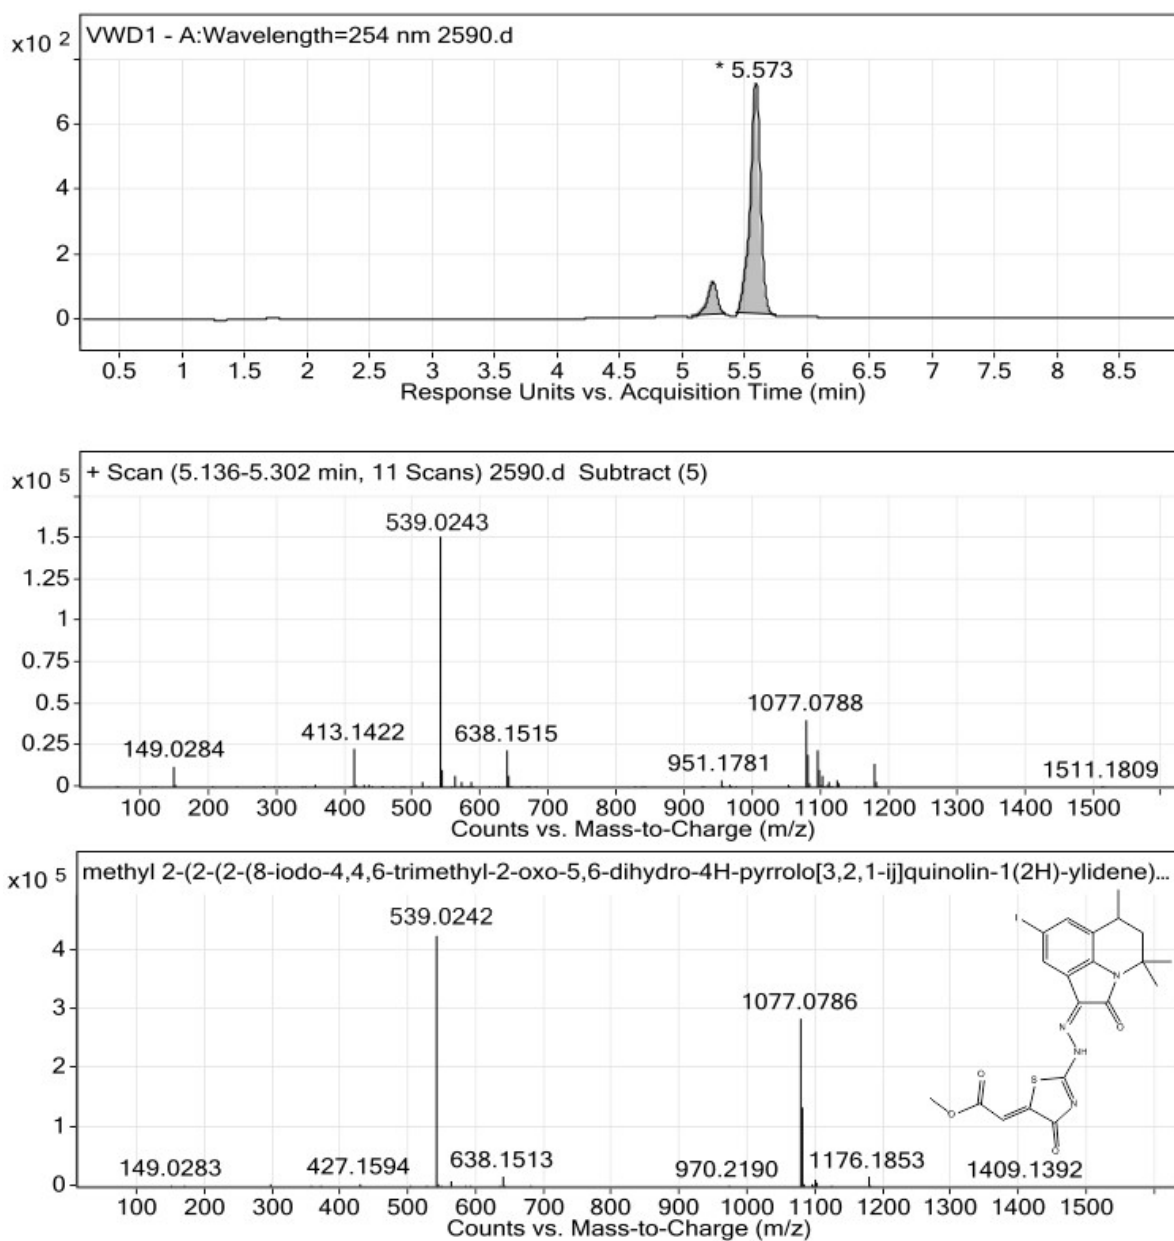

**Figure S15.** Data of HPLC-MS-ESI analysis of **3e**

**$^1\text{H}$ ,  $^{13}\text{C}$  NMR and data HPLC-HRMS-ESI spectra of methyl (Z)-2-(4-oxo-2-(2-((Z)-4,4,6,8,9-pentamethyl-2-oxo-5,6-dihydro-4*H*-pyrrolo[3,2,1-*ij*]quinolin-1(2*H*)-ylidene)hydrazineyl)thiazol-5(4*H*)-ylidene)acetate 3f**

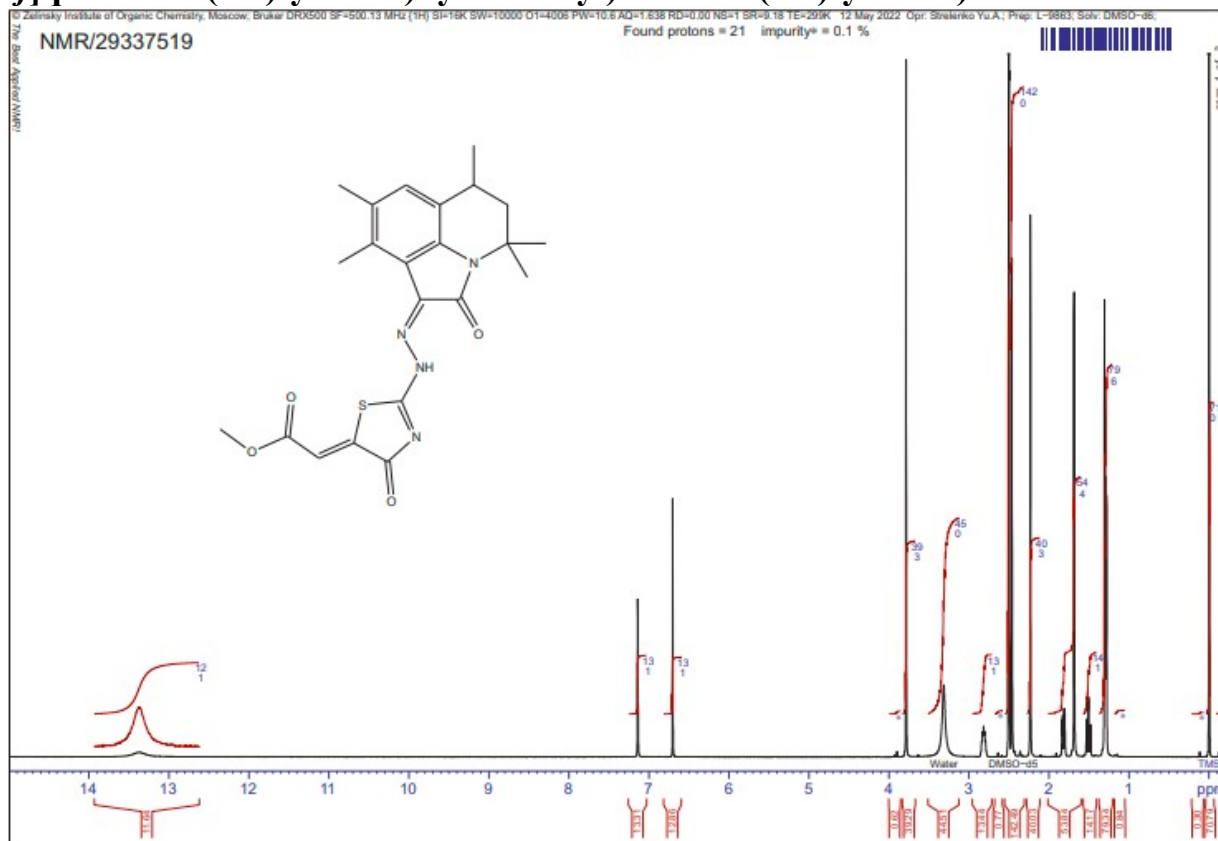

**Figure S16.**  $^1\text{H}$  NMR spectrum of compound 3f

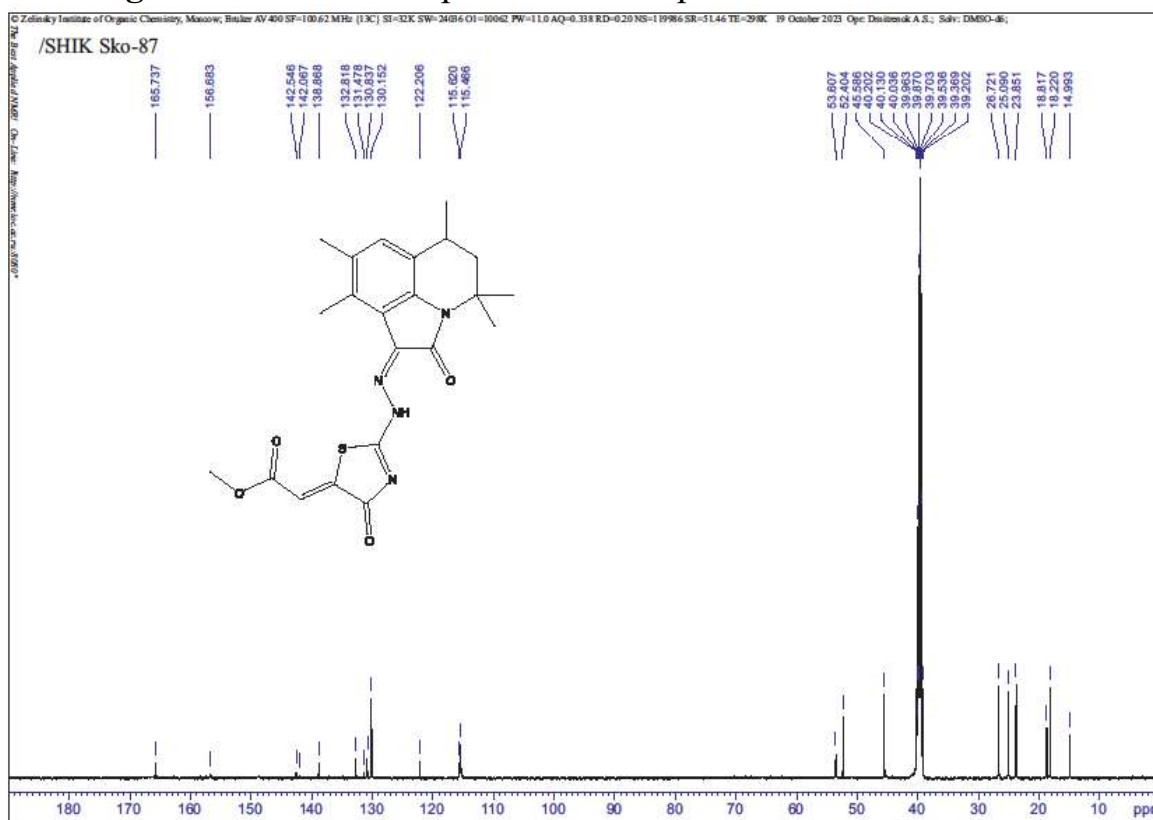

**Figure S17.**  $^{13}\text{C}$  NMR spectrum of compound 3f



**$^1\text{H}$ ,  $^{13}\text{C}$  NMR and data HPLC-HRMS-ESI spectra of methyl (Z)-2-(2-(2-(8-chloro-4,4,6,9-tetramethyl-2-oxo-5,6-dihydro-4*H*-pyrrolo[3,2,1-*ij*]quinolin-1(2*H*)-ylidene)hydrazineyl)-4-oxothiazol-5(4*H*)-ylidene)acetate **3g****

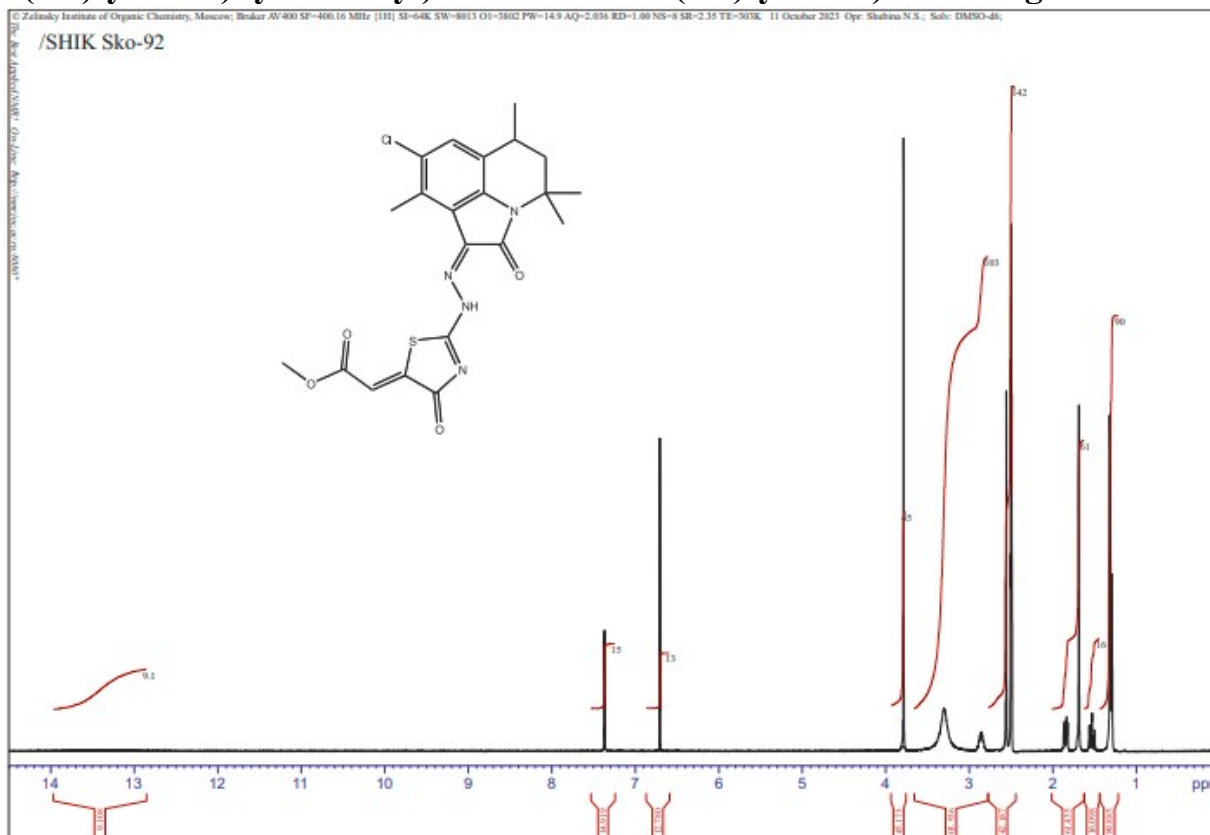

**Figure S19.**  $^1\text{H}$  NMR spectrum of compound **3g**

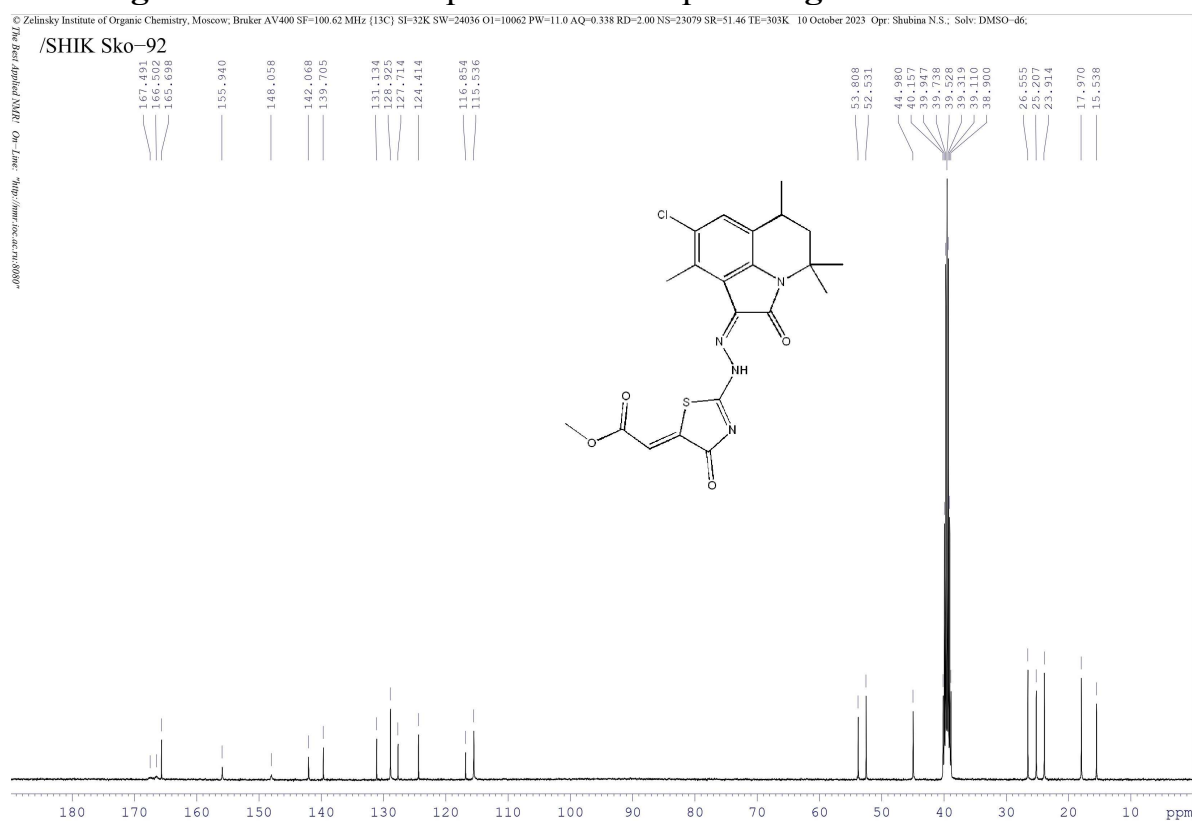

**Figure S20.**  $^{13}\text{C}$  NMR spectrum of compound **3g**





**$^1\text{H}$ ,  $^{13}\text{C}$  NMR and data HPLC-HRMS-ESI spectra of methyl (Z)-(2-(2-(2-(8-bromo-4,4,6,9-tetramethyl-2-oxo-5,6-dihydro-4*H*-pyrrolo[3,2,1-*ij*]quinolin-1(2*H*)-ylidene)hydrazineyl)-4-oxothiazol-5(4*H*)-ylidene)acetate **3h****

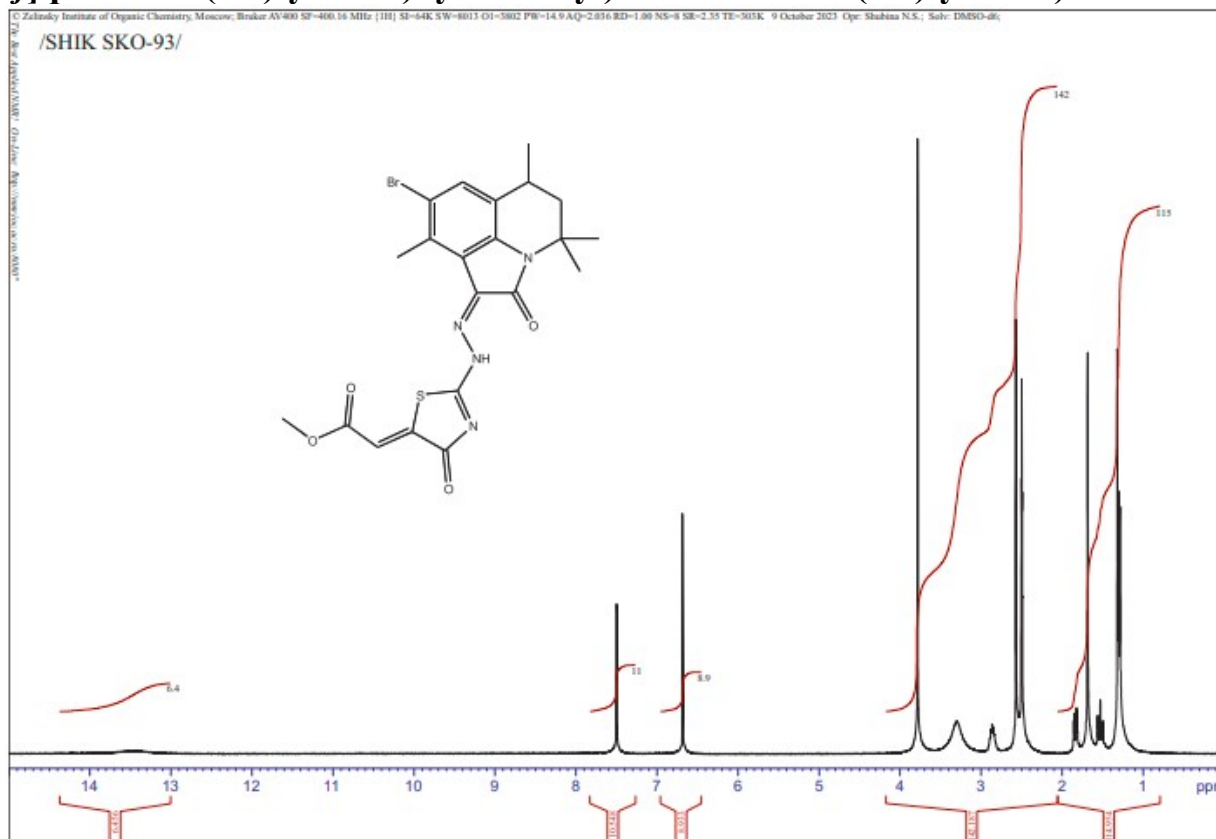

**Figure S22.**  $^1\text{H}$  NMR spectrum of compound **3h**

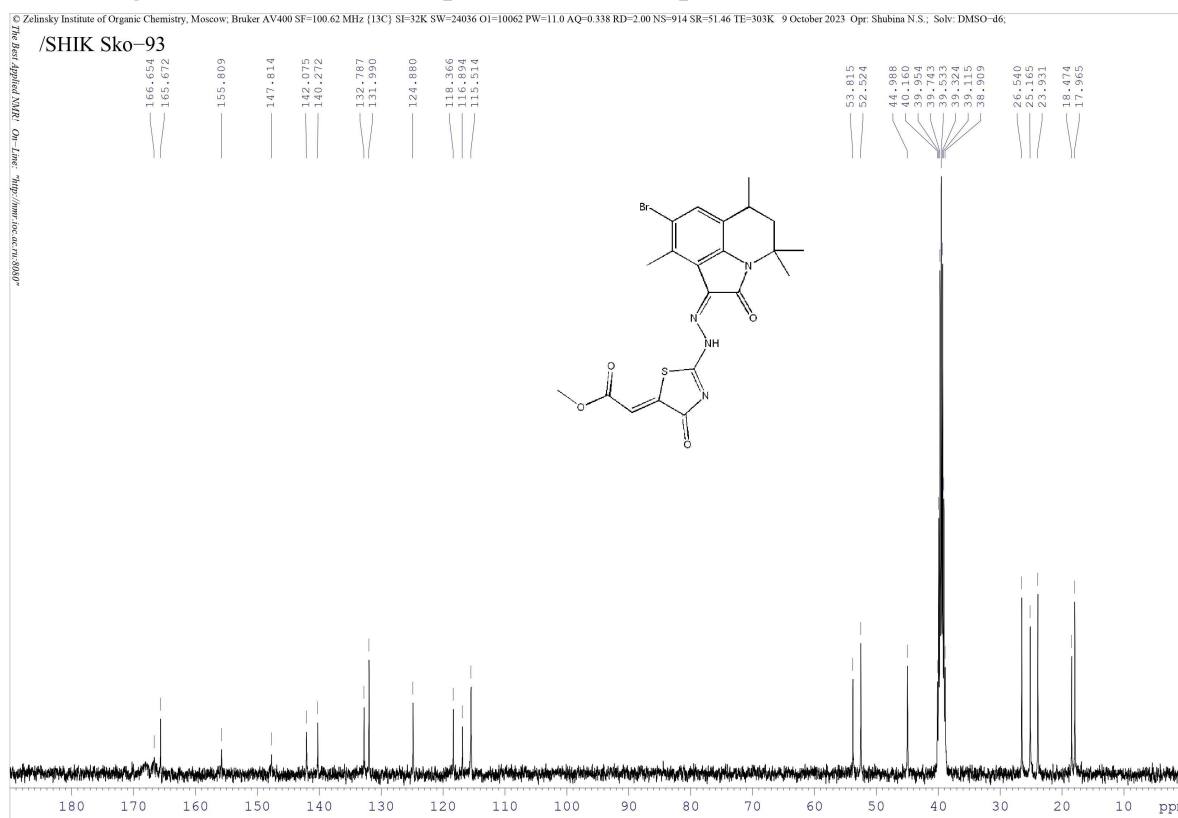

**Figure S23.**  $^{13}\text{C}$  NMR spectrum of compound **3h**

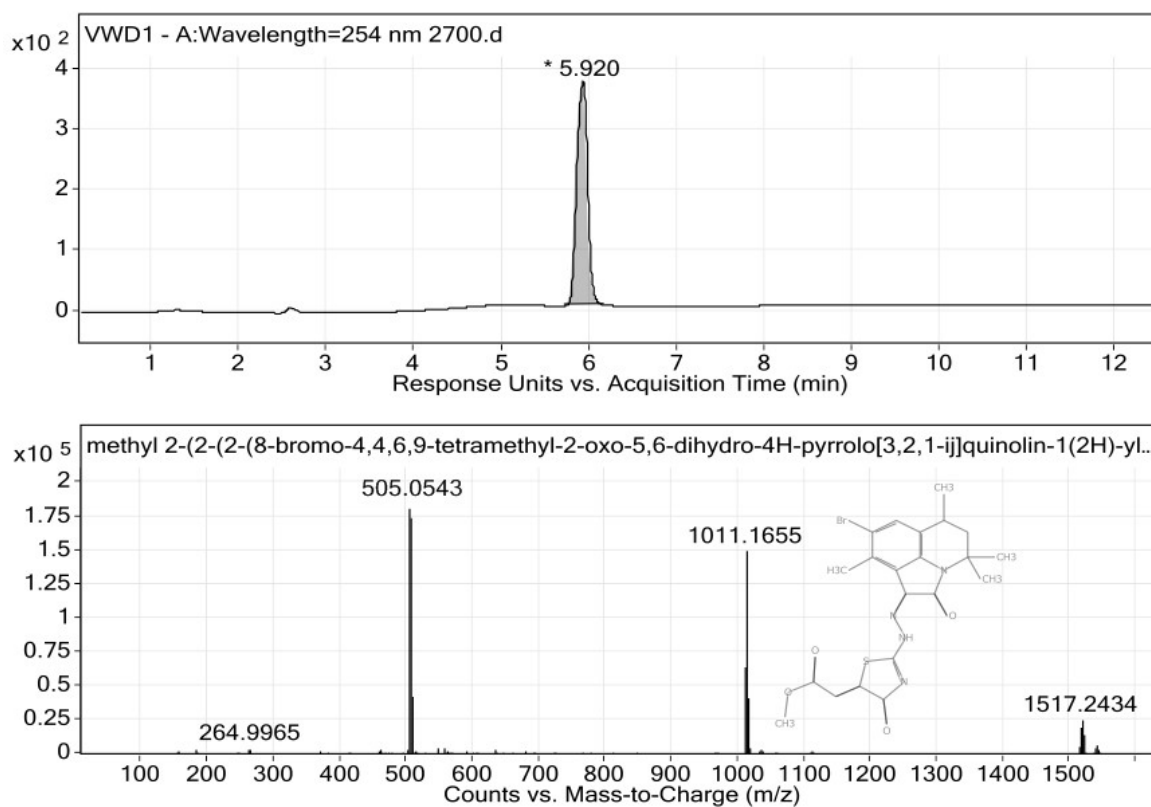

**Figure S24.** Data of HPLC-MS-ESI analysis of **3h**

**$^1\text{H}$ ,  $^{13}\text{C}$  NMR and data HPLC-HRMS-ESI spectra of methyl (Z)-2-(2-((Z)-6-(4-chlorophenyl)-4,4,6-trimethyl-2-oxo-5,6-dihydro-4*H*-pyrrolo[3,2,1-*ij*]quinolin-1(2*H*)-ylidene)hydrazineyl)-4-oxothiazol-5(4*H*)-ylidene)acetate **3i****

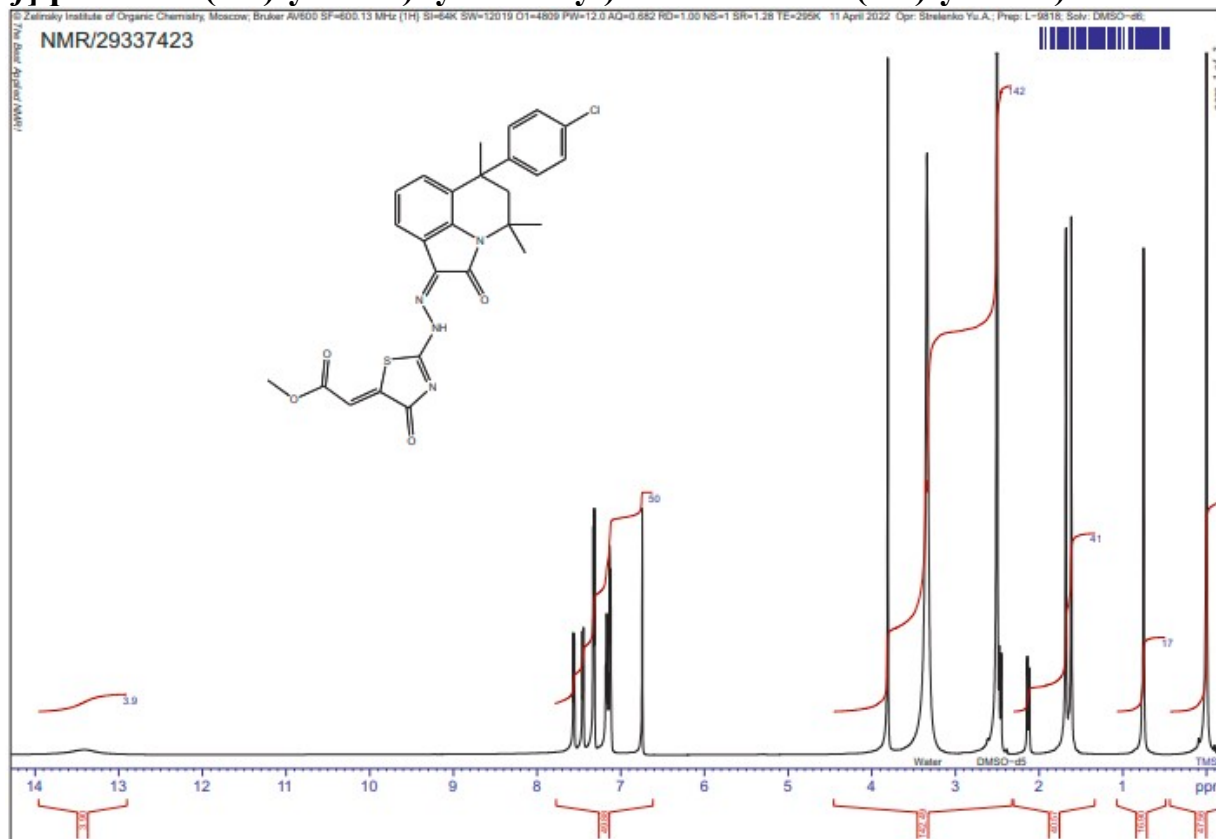

**Figure S25.**  $^1\text{H}$  NMR spectrum of compound **3i**

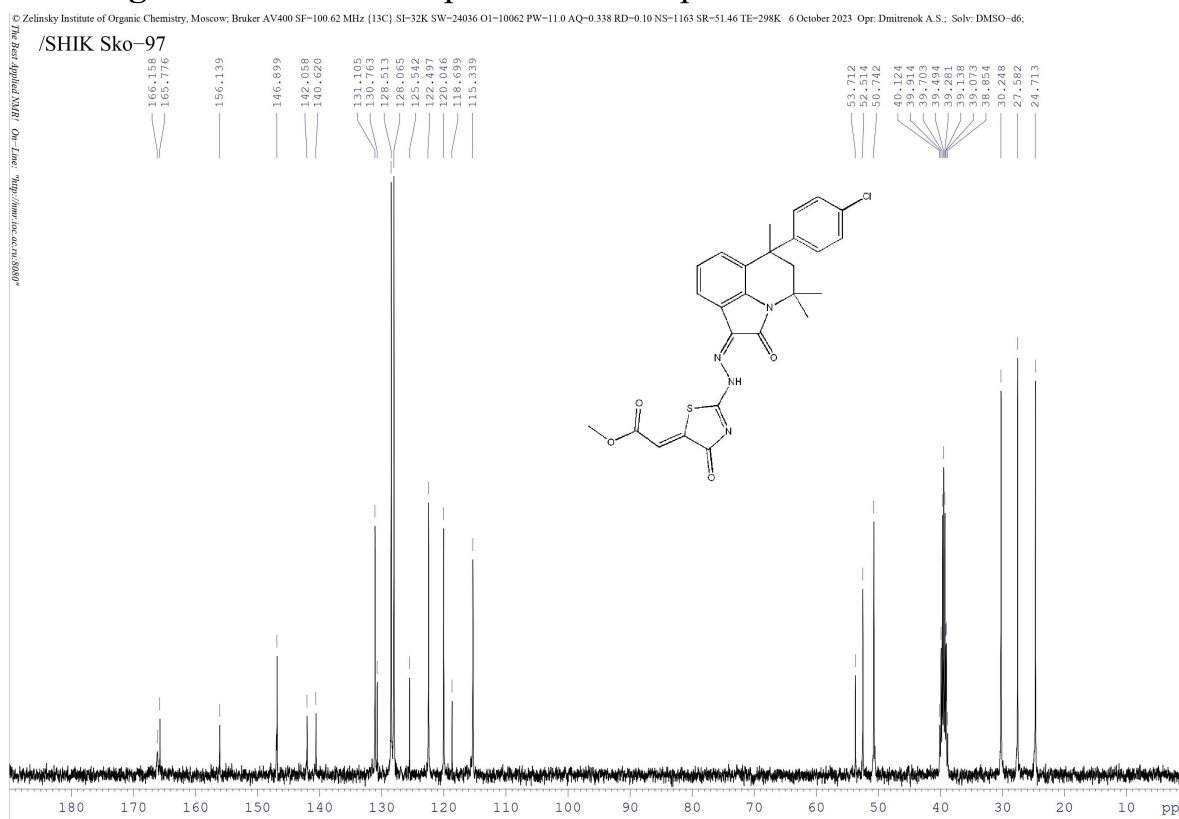

**Figure S26.**  $^{13}\text{C}$  NMR spectrum of compound **3i**

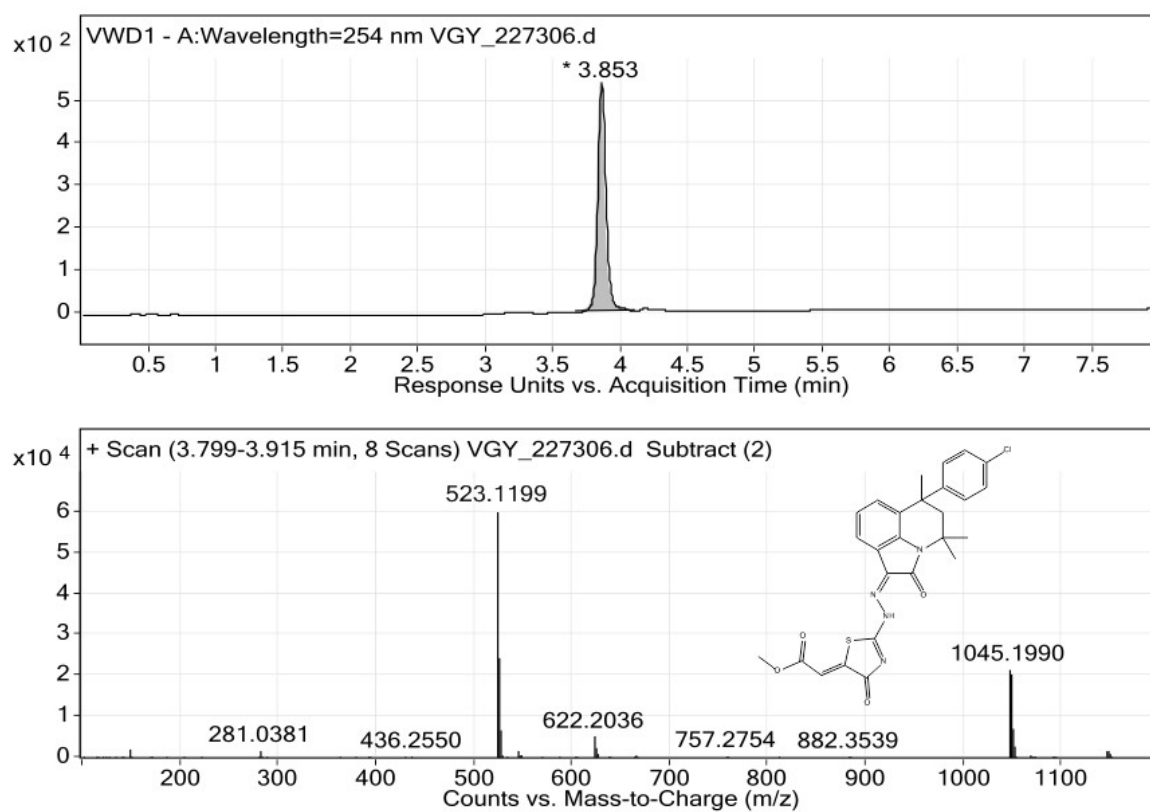

**Figure S27.** Data of HPLC-MS-ESI analysis of **3i**

**$^1\text{H}$ ,  $^{13}\text{C}$  NMR and data HPLC-HRMS-ESI spectra of methyl 2-(2-(2-(6-(4-chlorophenyl)-4,4,6,8-tetramethyl-2-oxo-5,6-dihydro-4*H*-pyrrolo[3,2,1-*ij*]quinolin-1(2*H*)-ylidene)hydrazineyl)-4-oxothiazol-5(4*H*)-ylidene)acetate **3j****

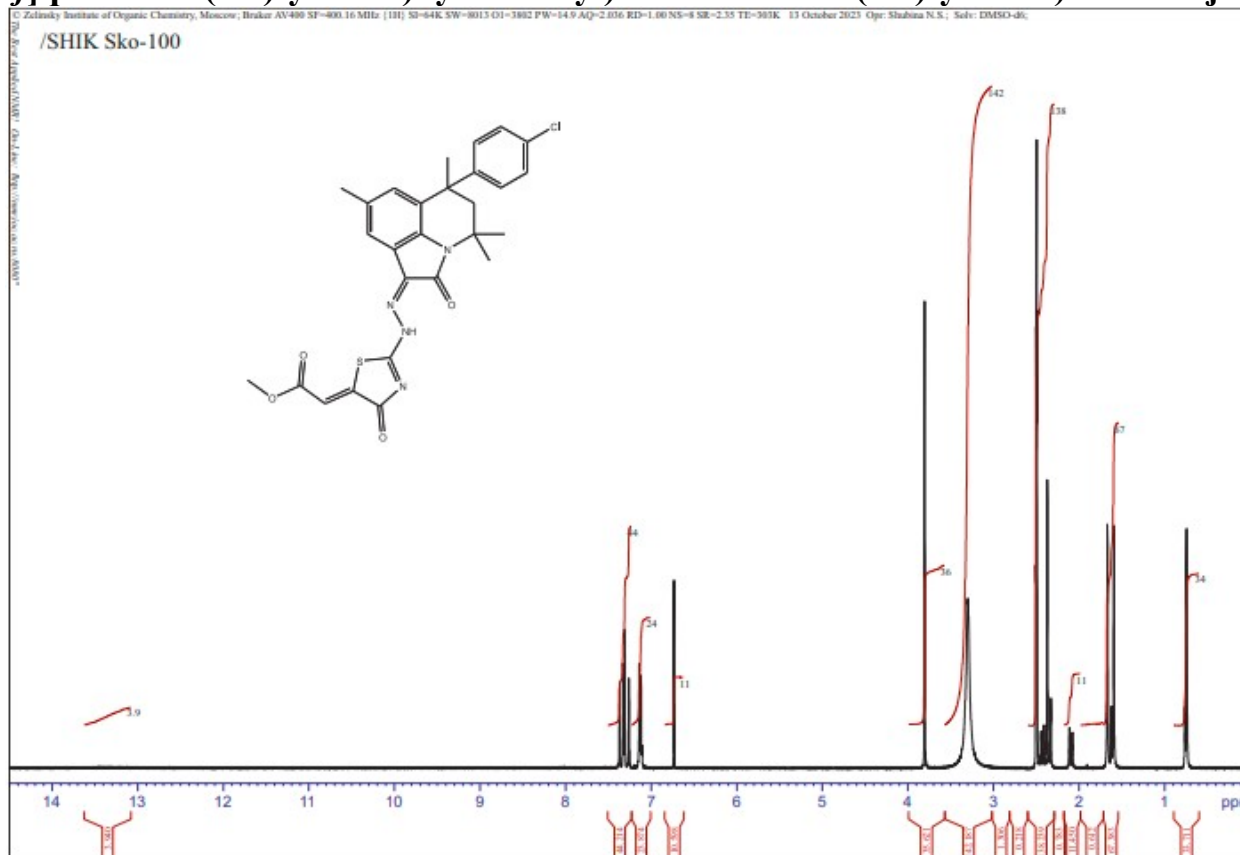

**Figure S28.**  $^1\text{H}$  NMR spectrum of compound **3j**

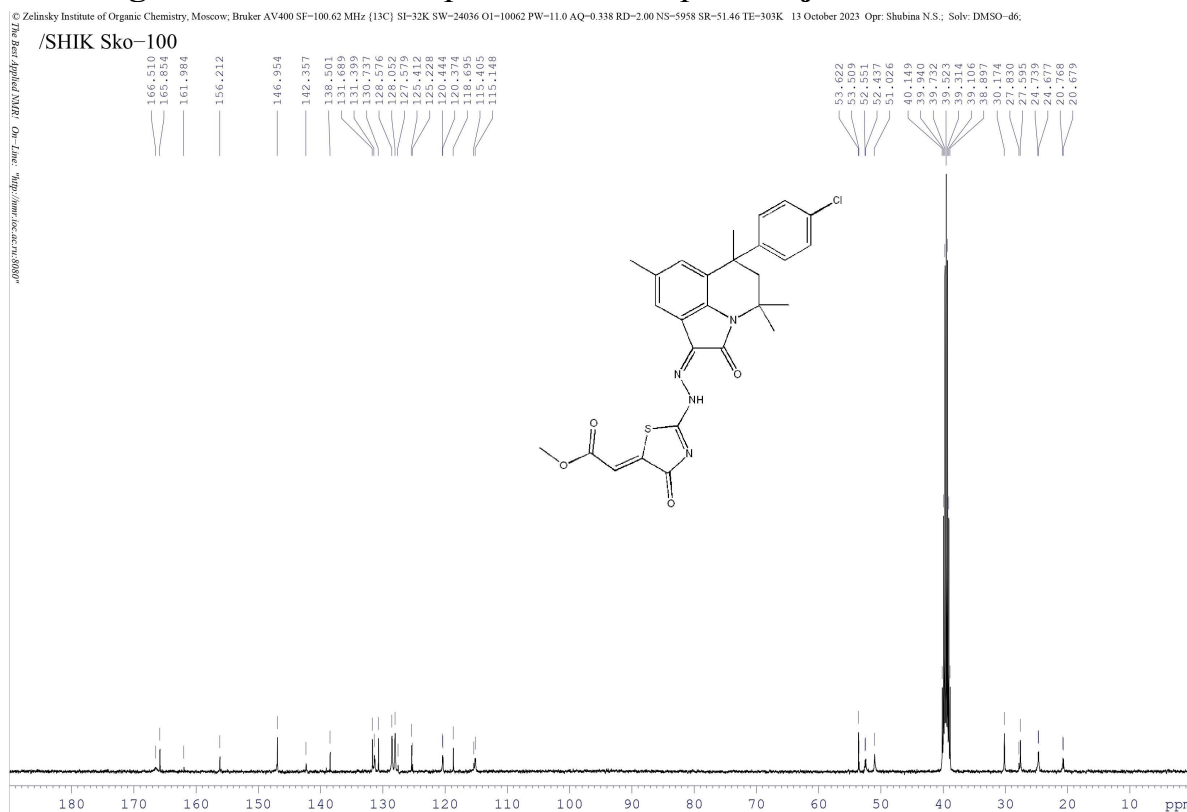

**Figure S29.**  $^{13}\text{C}$  NMR spectrum of compound **3j**

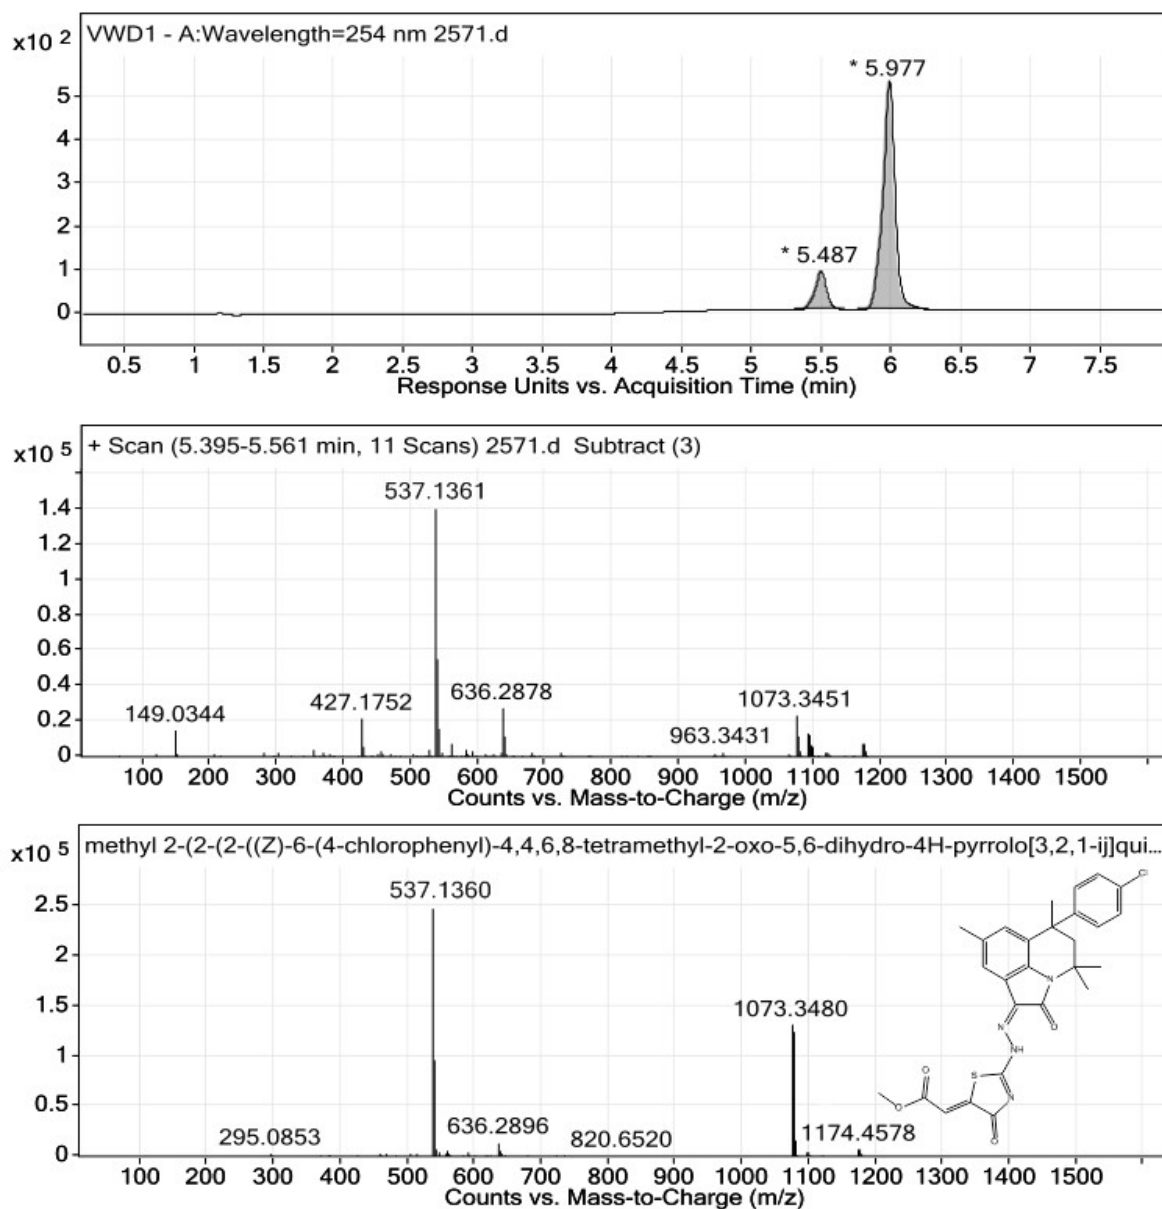

**Figure S30.** Data of HPLC-MS-ESI analysis of **3j**

© Zelinsky Institute of Organic Chemistry, Moscow; Bruker AV-400 51~400.16 MHz <sup>1</sup>H; 51~64K SW~8013 GJ~5802 PH~14.9 AQ~2.036 RD~1.08 NS~8 SR~2.35 TE~303K 12 October 2023 Op: Shabina N.S.; Solv: DMSO-d<sub>6</sub>  
/SHIK Sko-98

Chemical structure of compound 13 is shown above the spectrum. The spectrum displays peaks from 0 to 14 ppm with corresponding integrations. A small peak at 13.1 ppm is labeled '1.1'. Peaks in the aromatic region (6.5-7.5 ppm) are labeled with integrations 2.9, 4.0, and 1.1. A large peak at 3.42 ppm is labeled '4.2'. Other peaks are labeled with integrations 1.6, 1.2, 2.2, and 3.6.

© Zelinsky Institute of Organic Chemistry, Moscow; Bruker AV400 SF-100.62 MHz [13C] SF-32K SW-24036 O1-10062 PW-11.0 AQ-0.338 RD-0.50 NS-24576 SR-51.46 TE-303K 12 October 2023 Opr: Shubina N.S.; Solv: DMSO-d6; /SHIK Sko-98

167.442  
166.168  
165.765

155.727

146.346  
145.364  
141.924  
139.477

130.924  
130.234  
130.175  
128.807  
128.123  
127.641  
126.807  
120.358  
119.415  
115.634  
115.555

53.896  
52.599  
52.487  
50.659

40.151  
39.942  
39.733  
39.526  
39.315  
39.107  
38.899

29.951  
27.467  
24.747  
24.685

180 170 160 150 140 130 120 110 100 90 80 70 60 50 40 30 20 10 ppm

Chemical structure of compound 98 is shown above the spectrum.



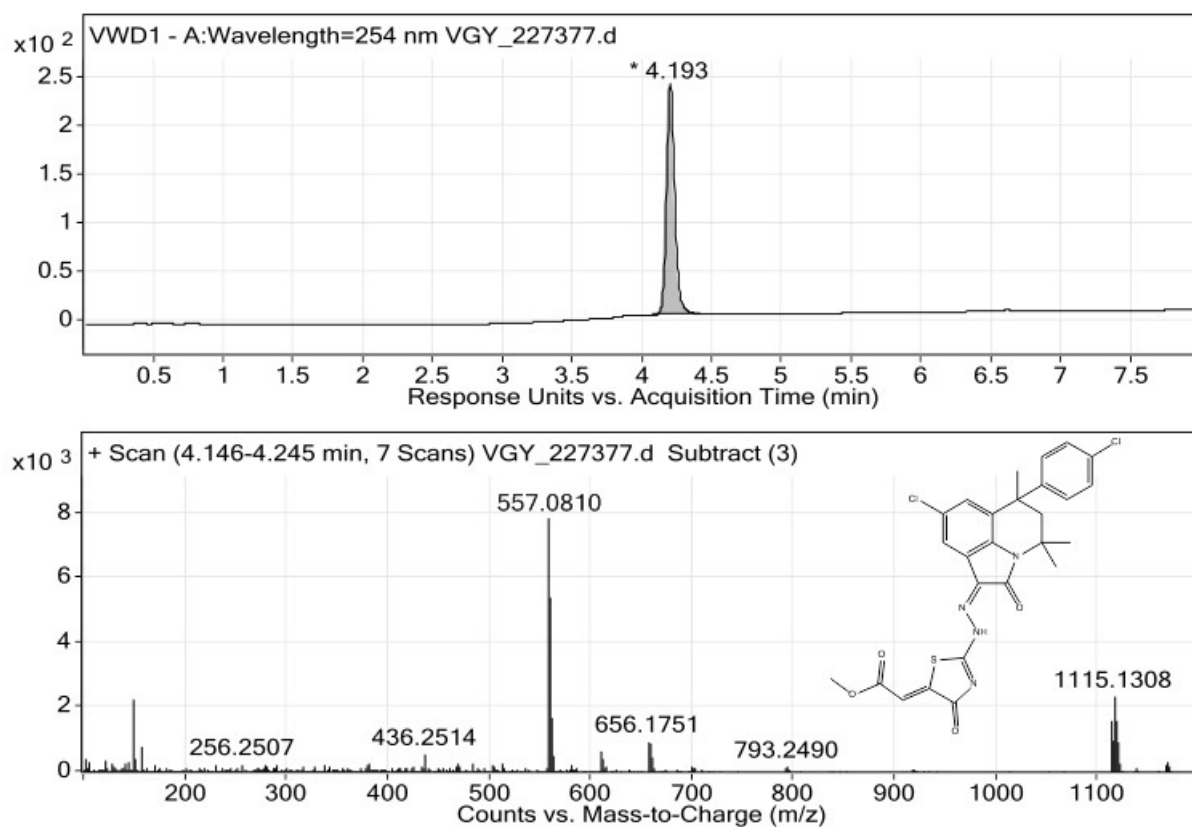

**Figure S33.** Data of HPLC-MS-ESI analysis of **3k**

**$^1\text{H}$ ,  $^{13}\text{C}$  NMR and data HPLC-HRMS-ESI spectra of methyl (Z)-2-(2-((Z)-8-bromo-6-(4-chlorophenyl)-4,4,6-trimethyl-2-oxo-5,6-dihydro-4H-pyrrolo[3,2,1-*ij*]quinolin-1(2H)-ylidene)hydrazineyl)-4-oxothiazol-5(4H)-ylidene)acetate **3l****

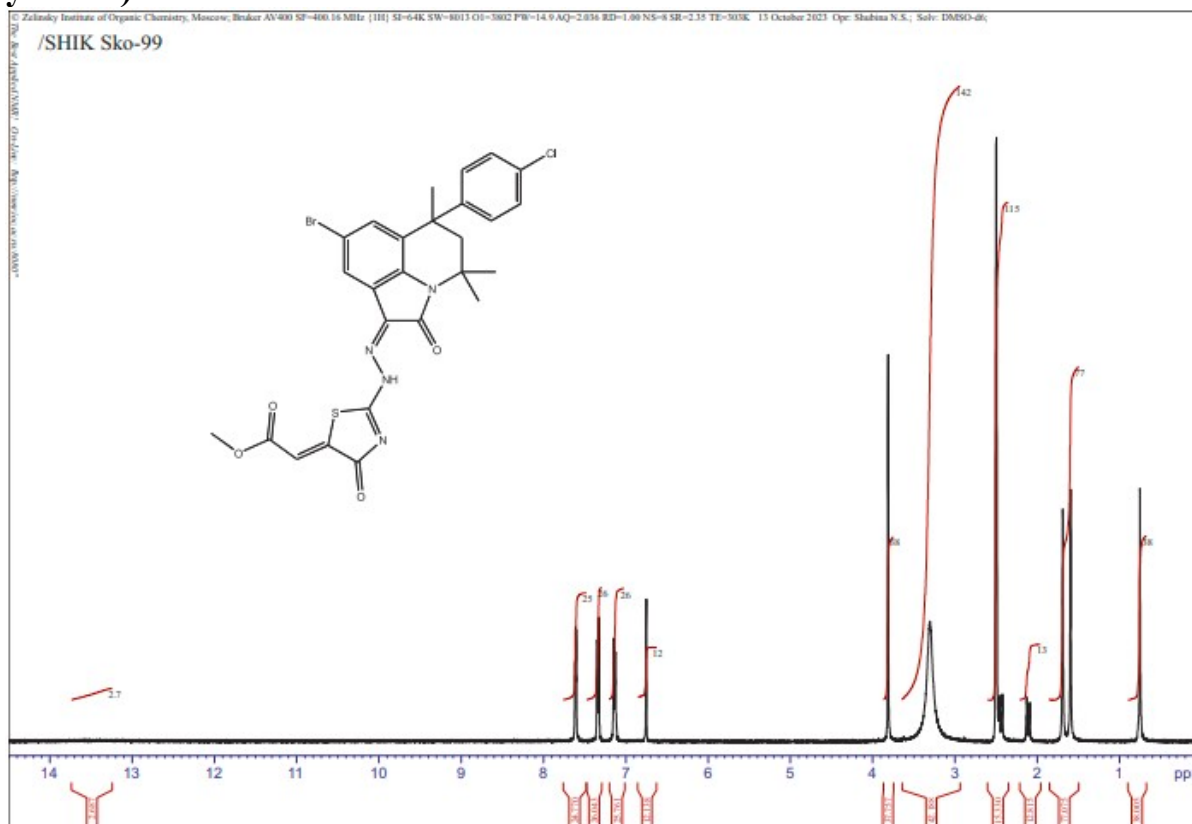

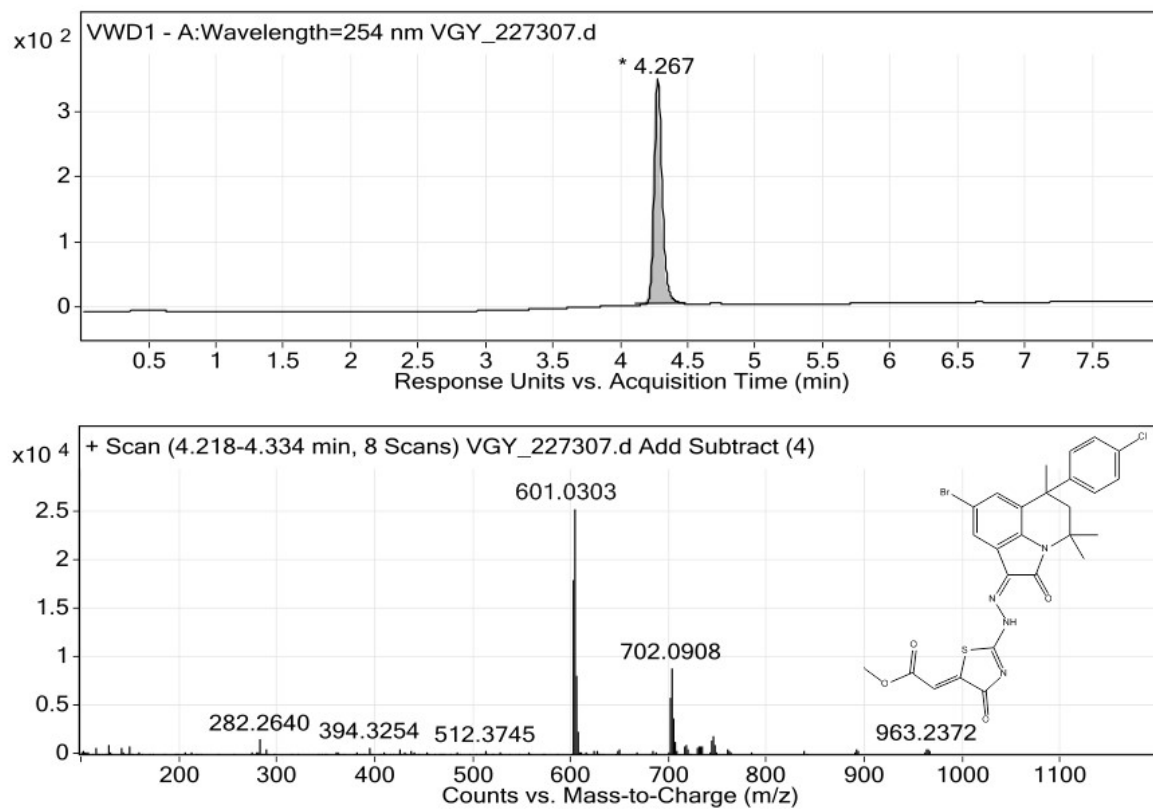

**Figure S36.** Data of HPLC-MS-ESI analysis of **31**

**$^1\text{H}$ ,  $^{13}\text{C}$  NMR and data HPLC-HRMS-ESI spectra of methyl 2-(2-(2-(6-(4-chlorophenyl)-8-fluoro-4,4,6-trimethyl-2-oxo-5,6-dihydro-4*H*-pyrrolo[3,2,1-*ij*]quinolin-1(2*H*)-ylidene)hydrazineyl)-4-oxothiazol-5(4*H*)-ylidene)acetate **3m****

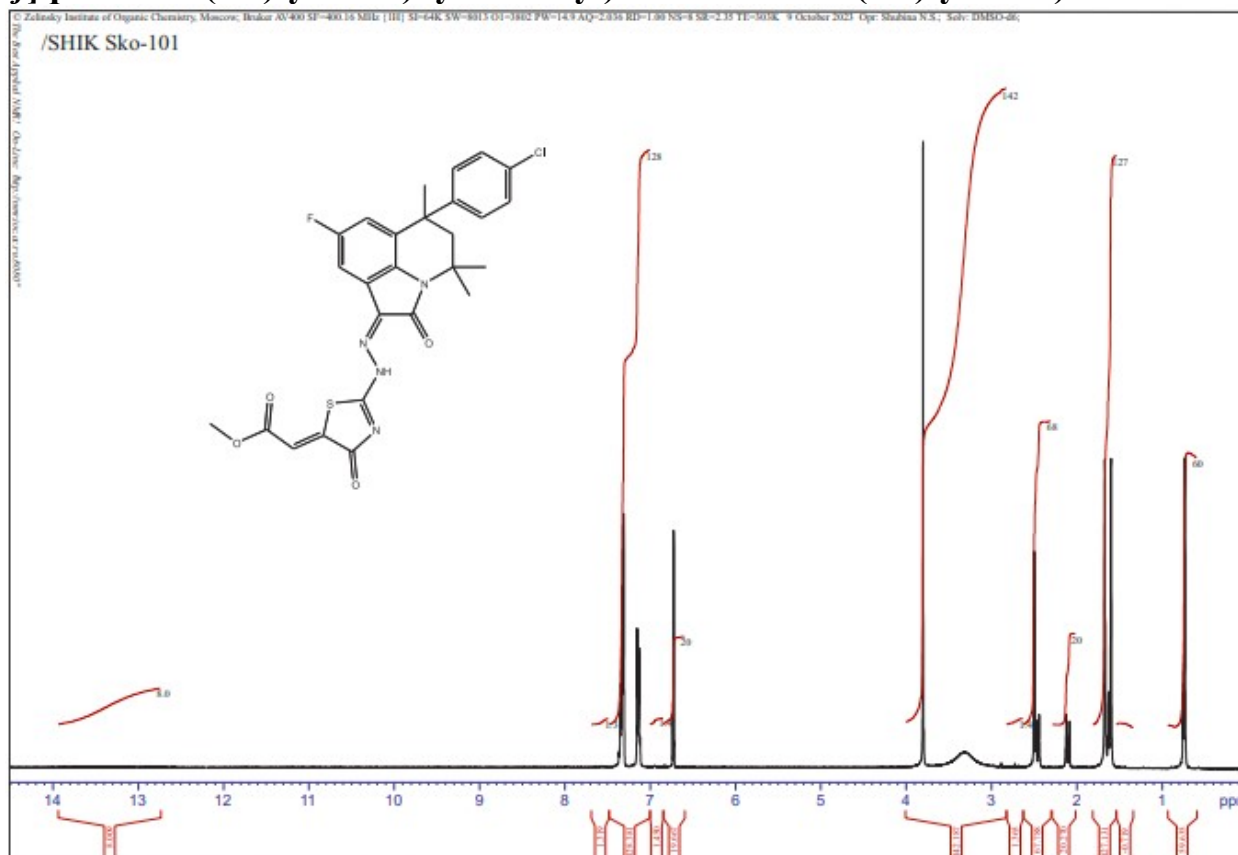

**Figure S37.  $^1\text{H}$  NMR spectrum of compound **3m****

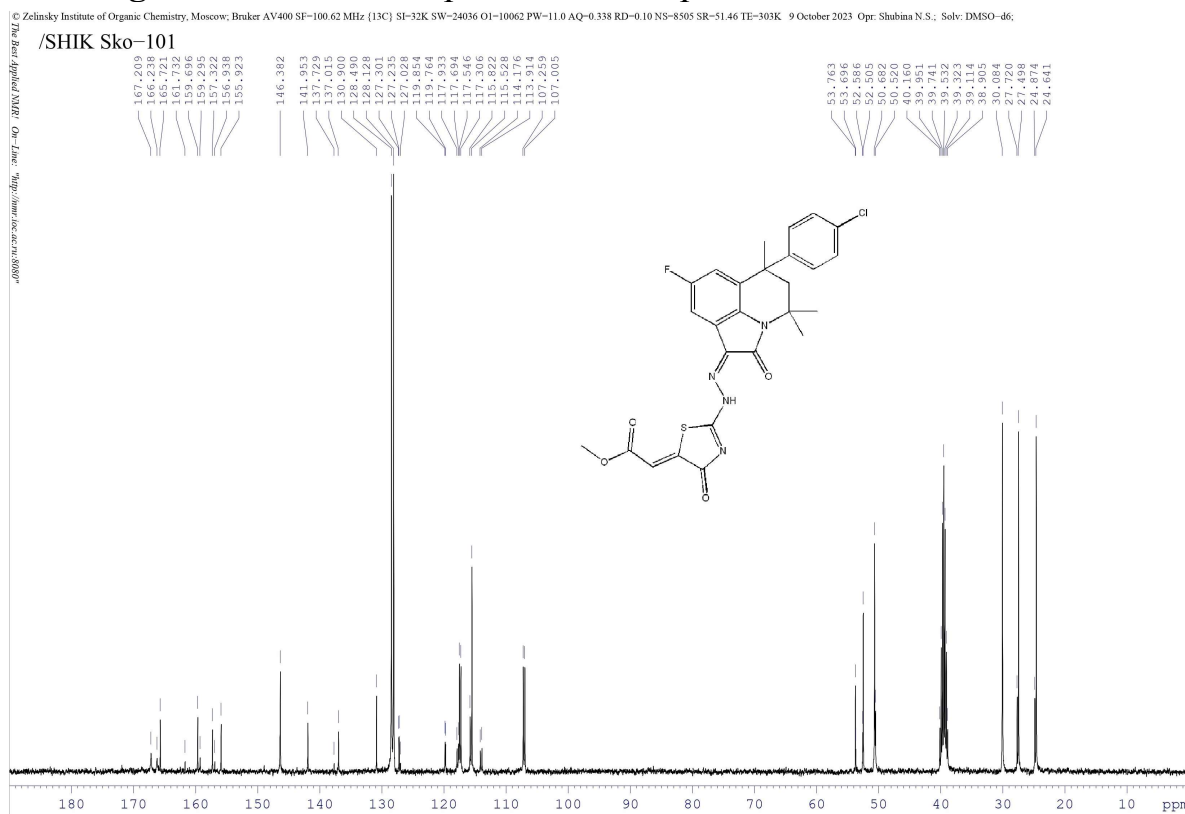

**Figure S38.  $^{13}\text{C}$  NMR spectrum of compound **3m****

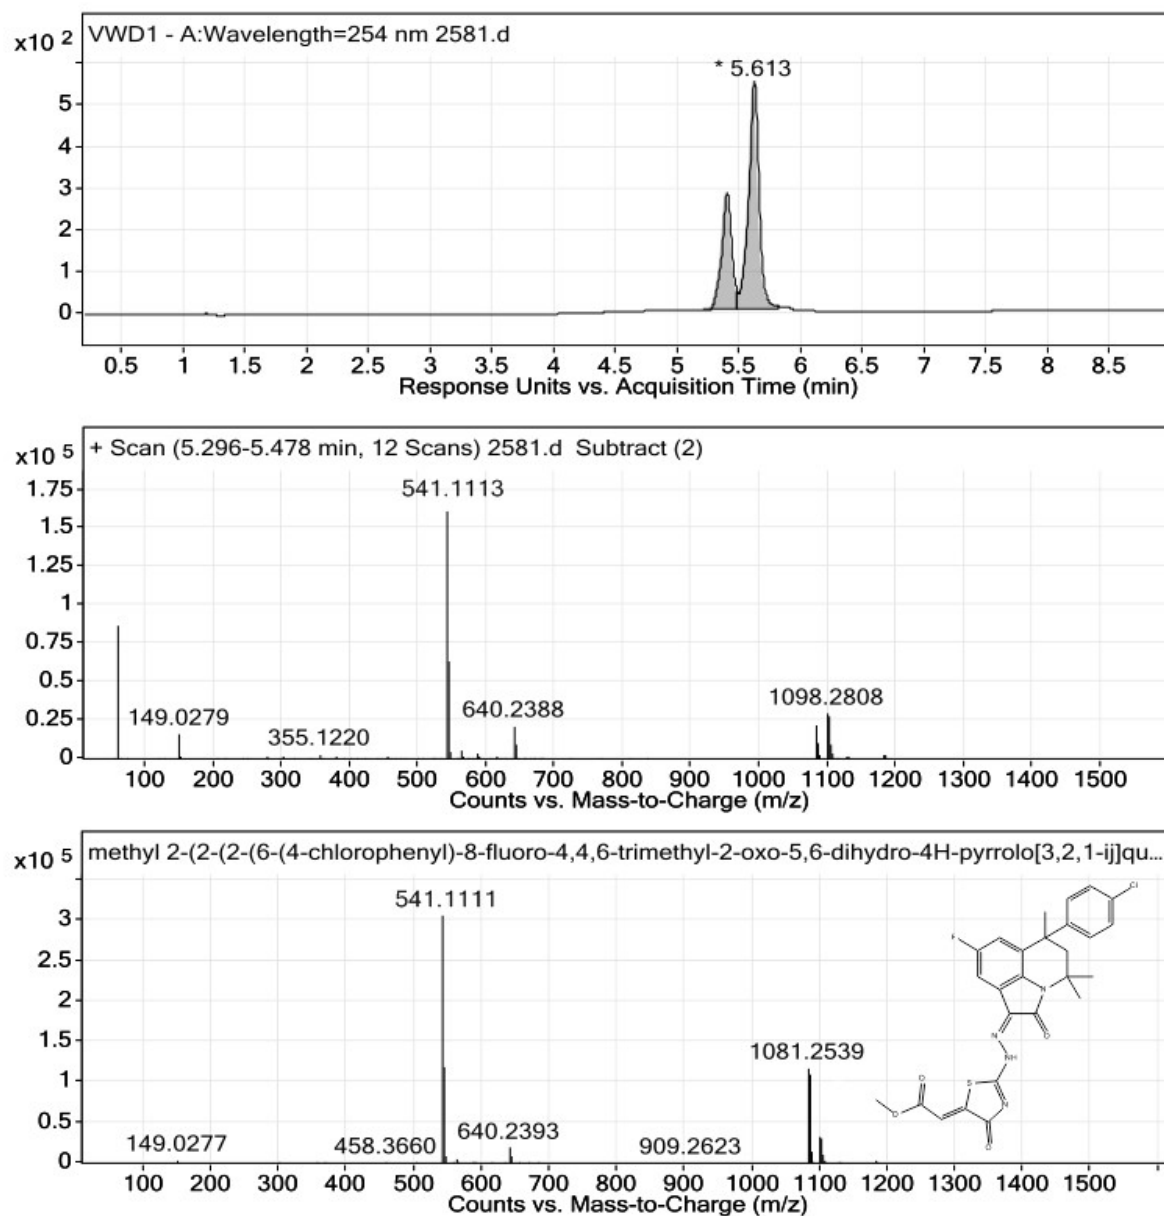

**Figure S39.** Data of HPLC-MS-ESI analysis of **3m**

**$^1\text{H}$ ,  $^{13}\text{C}$  NMR and data HPLC-HRMS-ESI spectra of methyl (Z)-2-(4-oxo-2-(2-((Z)-4,4,6-trimethyl-2-oxo-6-phenyl-5,6-dihydro-4H-pyrrolo[3,2,1-*ij*]quinolin-1(2H)-ylidene)hydrazineyl)thiazol-5(4H)-ylidene)acetate 3n**

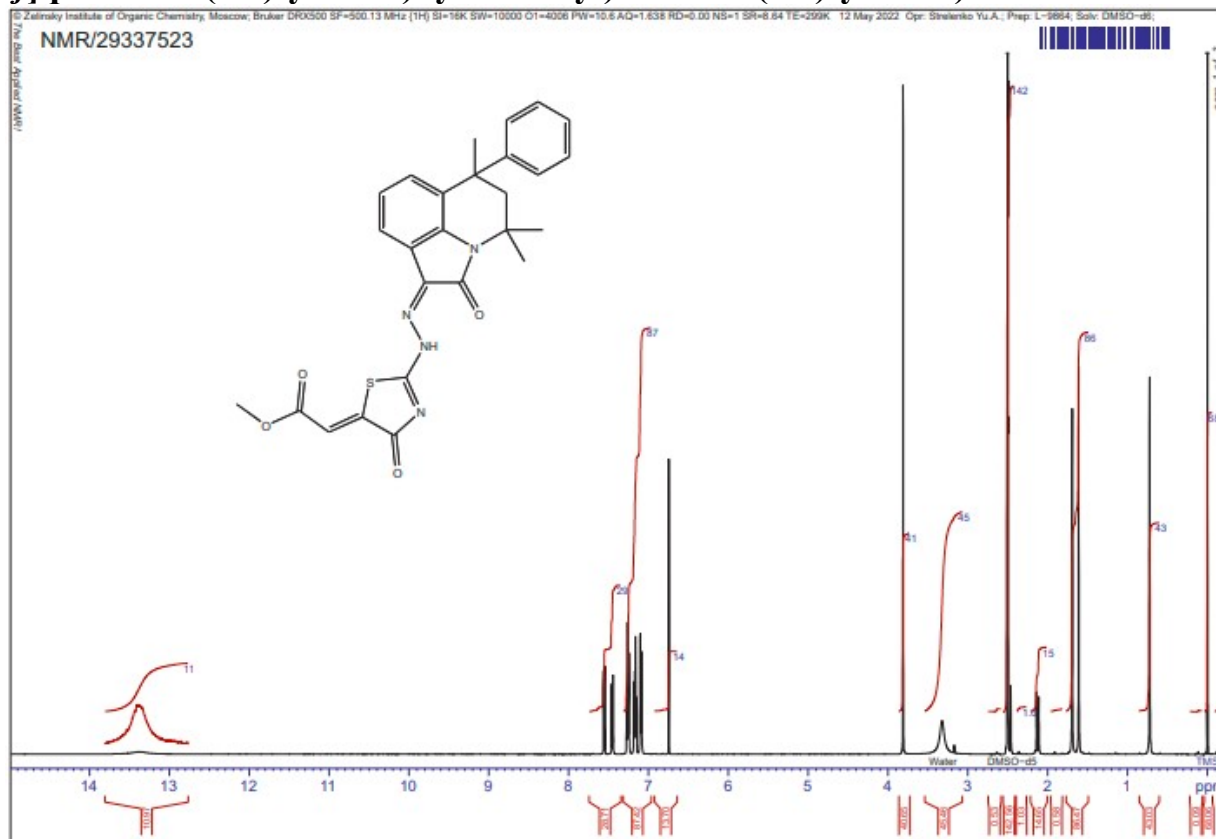

**Figure S40.**  $^1\text{H}$  NMR spectrum of compound 3n

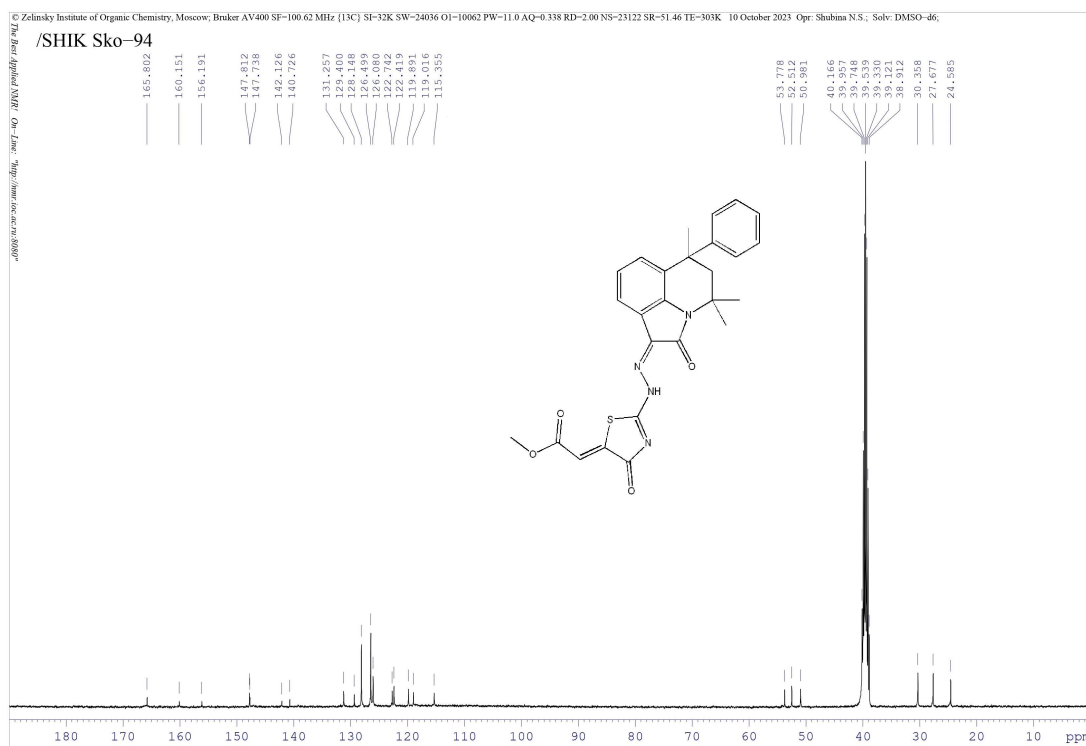

**Figure S41.**  $^{13}\text{C}$  NMR spectrum of compound 3n

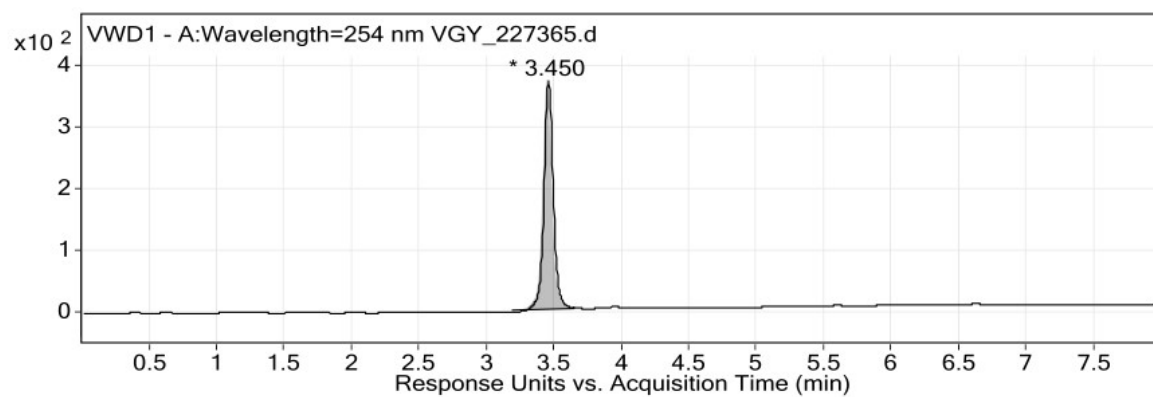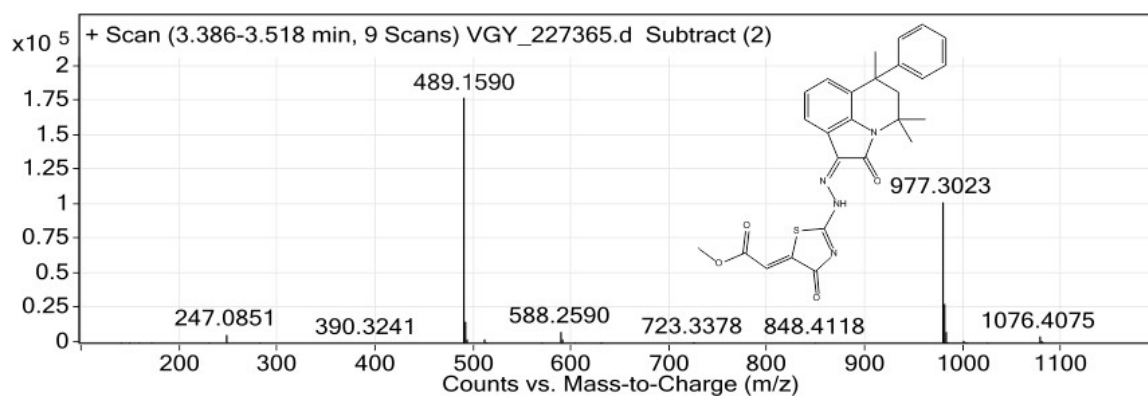

**Figure S42.** Data of HPLC-MS-ESI analysis of **3n**

**$^1\text{H}$ ,  $^{13}\text{C}$  NMR and data HPLC-HRMS-ESI spectra of methyl (Z)-2-(2-((Z)-8-chloro-4,4,6-trimethyl-2-oxo-6-phenyl-5,6-dihydro-4*H*-pyrrolo[3,2,1-*ij*]quinolin-1(2*H*)-ylidene)hydrazineyl)-4-oxothiazol-5(4*H*)-ylidene)acetate **3o****

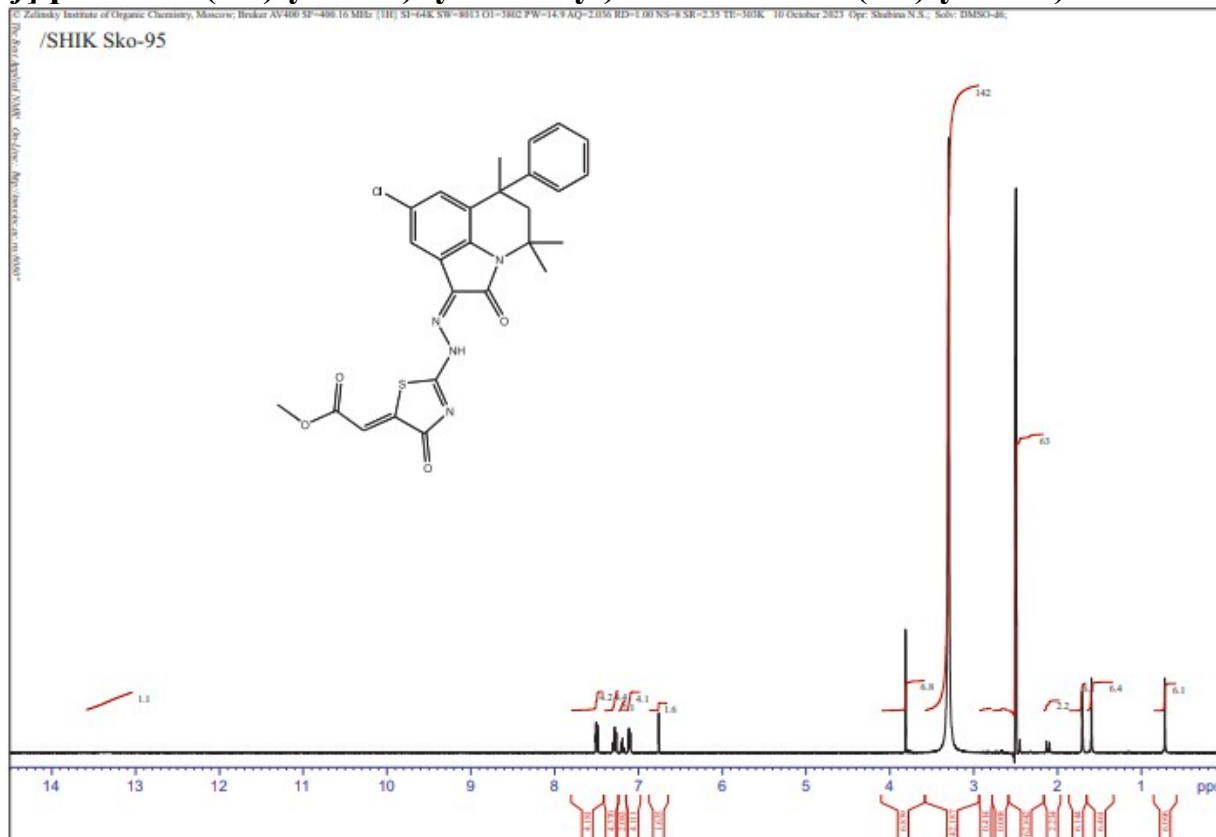

**Figure S43.**  $^1\text{H}$  NMR spectrum of compound **3o**

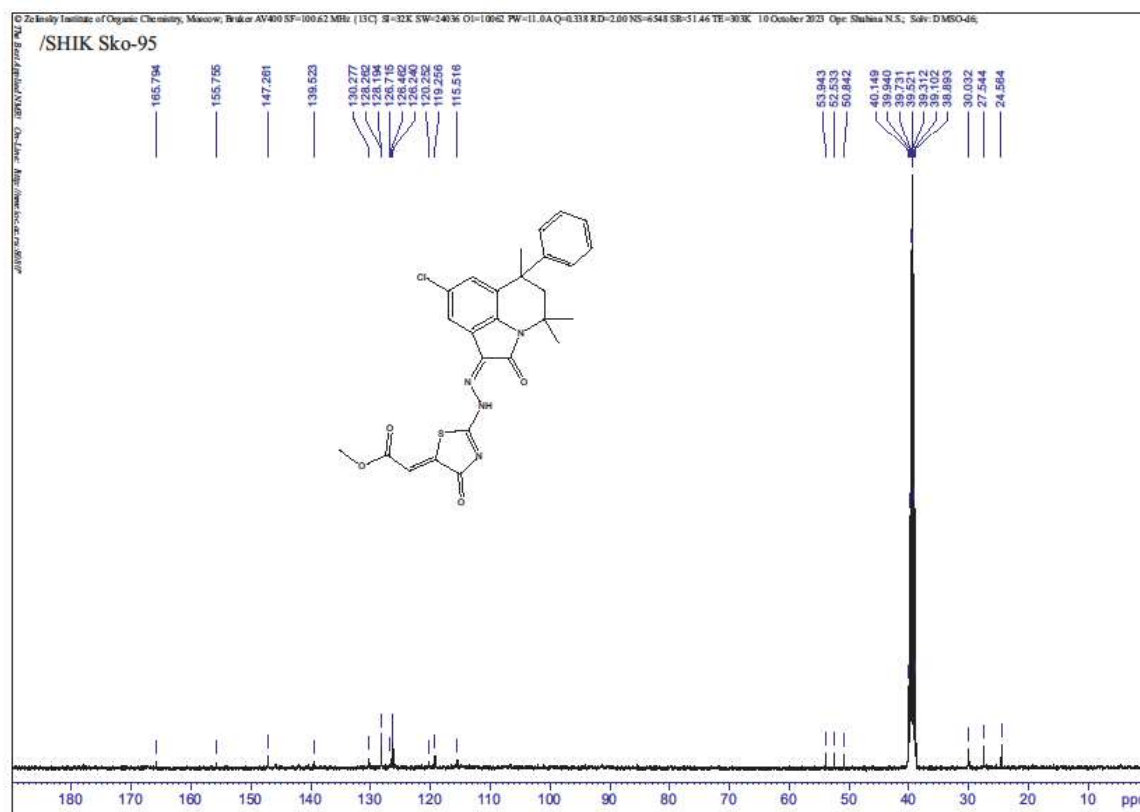

**Figure S44.**  $^{13}\text{C}$  NMR spectrum of compound **3o**





© Zelinsky Institute of Organic Chemistry, Moscow; Bruker DPX350 SP-500.13 MHz (1H) SI-16K SW-10500 C1-400K PW-10.8 AQ-1.638 RD-0.00 NS-1 SP-6.75 TE-299K 12 May 2022 Opr: Shalenko Yu.A.; Prep: L-9894; Solv: DMSO-d6;

**NMR/29337522**

Found protons = 22    impurity = 0.5 %

Chemical structure of compound **1**: COC(=O)/C=C1/C(=O)N=C1N2C(=O)N(C(C)(C)C)C(C)(C)C2c3ccc(Br)cc3

<sup>1</sup>H NMR spectrum (DMSO-d<sub>6</sub>) showing peaks and integration values:

| Chemical Shift (ppm) | Integration |
|----------------------|-------------|
| ~13.5                | 10.1        |
| ~8.2                 | 2.2         |
| ~7.5                 | 7.3         |
| ~7.2                 | 1.3         |
| ~3.8                 | 3.0         |
| ~3.3                 | 1.4         |
| ~2.5                 | 42.0        |
| ~2.0                 | 5.4         |
| ~1.5                 | 4.2         |

[illegible]

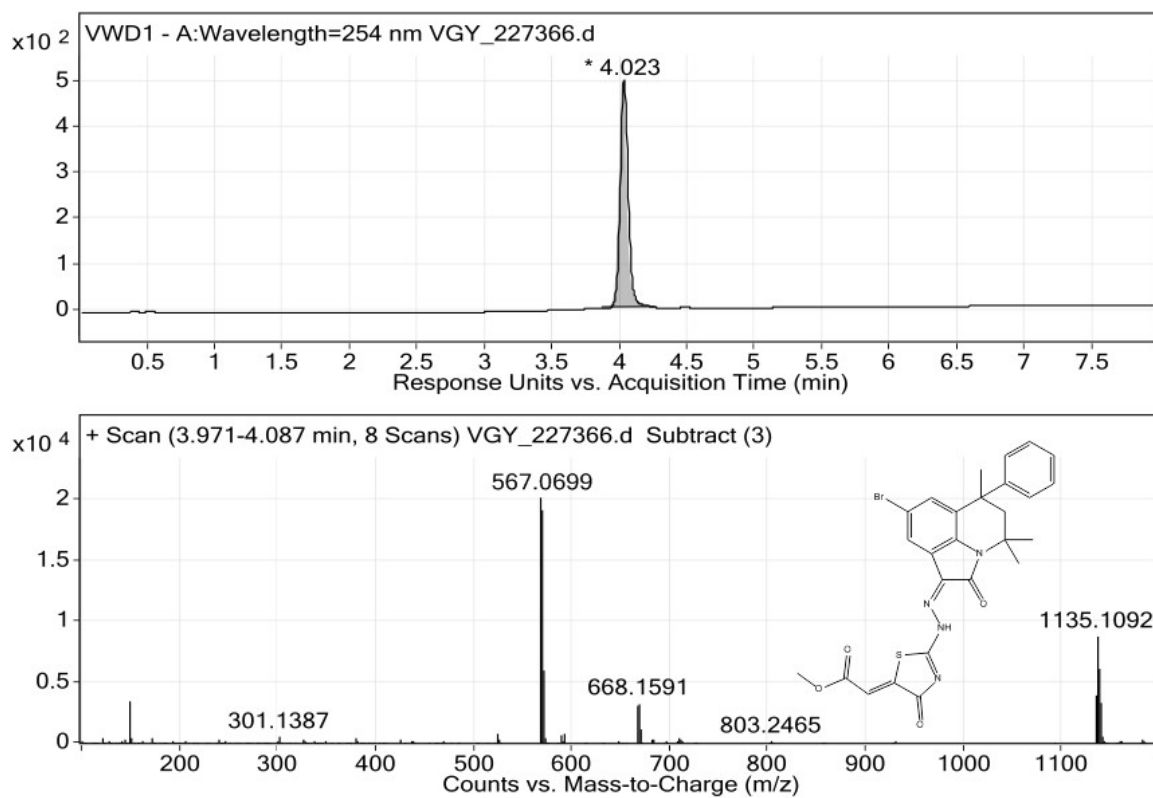

**Figure S48.** Data of HPLC-MS-ESI analysis of **3p**

**$^1\text{H}$ ,  $^{13}\text{C}$  NMR and data HPLC-HRMS-ESI spectra of methyl (Z)-2-(2-(2-((Z)-8-fluoro-4,4,6-trimethyl-2-oxo-6-phenyl-5,6-dihydro-4H-pyrrolo[3,2,1-*ij*]quinolin-1(2H)-ylidene)hydrazineyl)-4-oxothiazol-5(4H)-ylidene)acetate 3q**

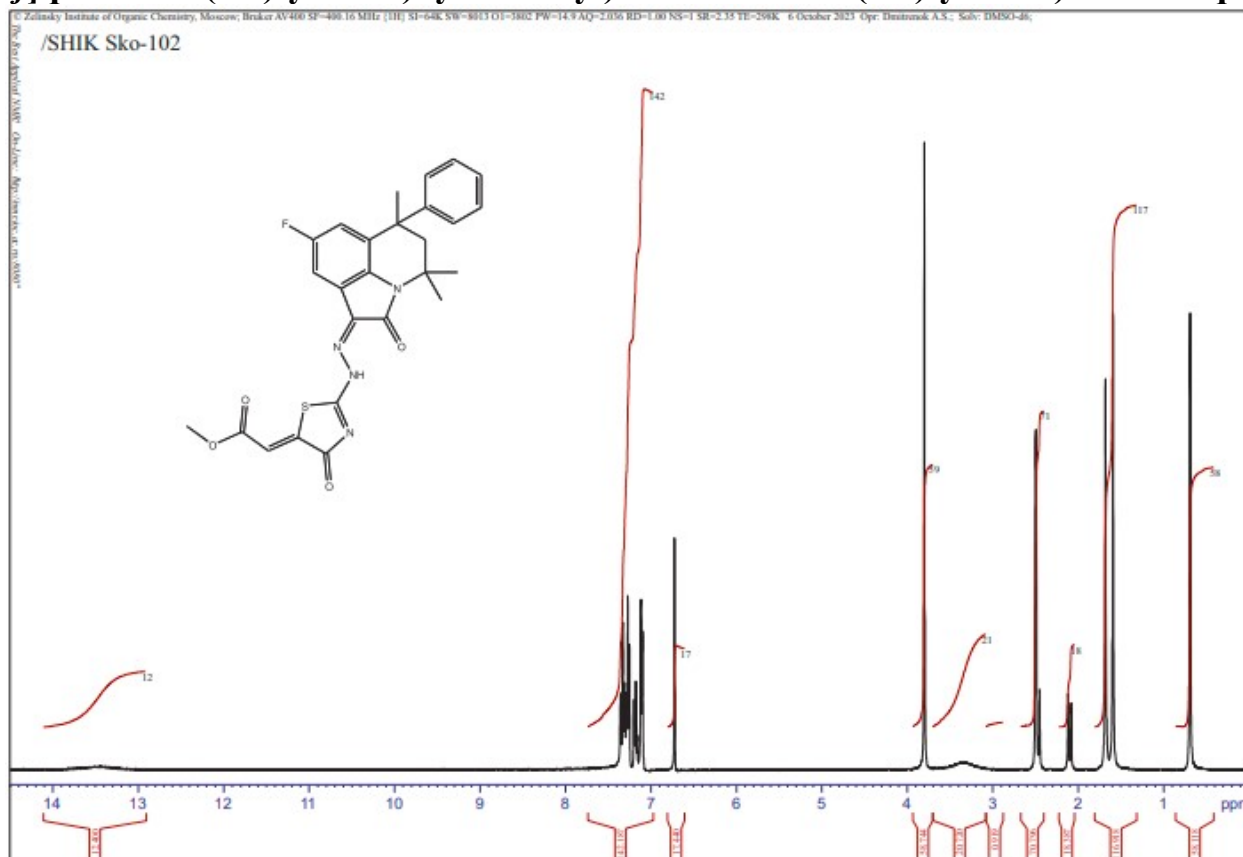

**Figure S49.**  $^1\text{H}$  NMR spectrum of compound 3q

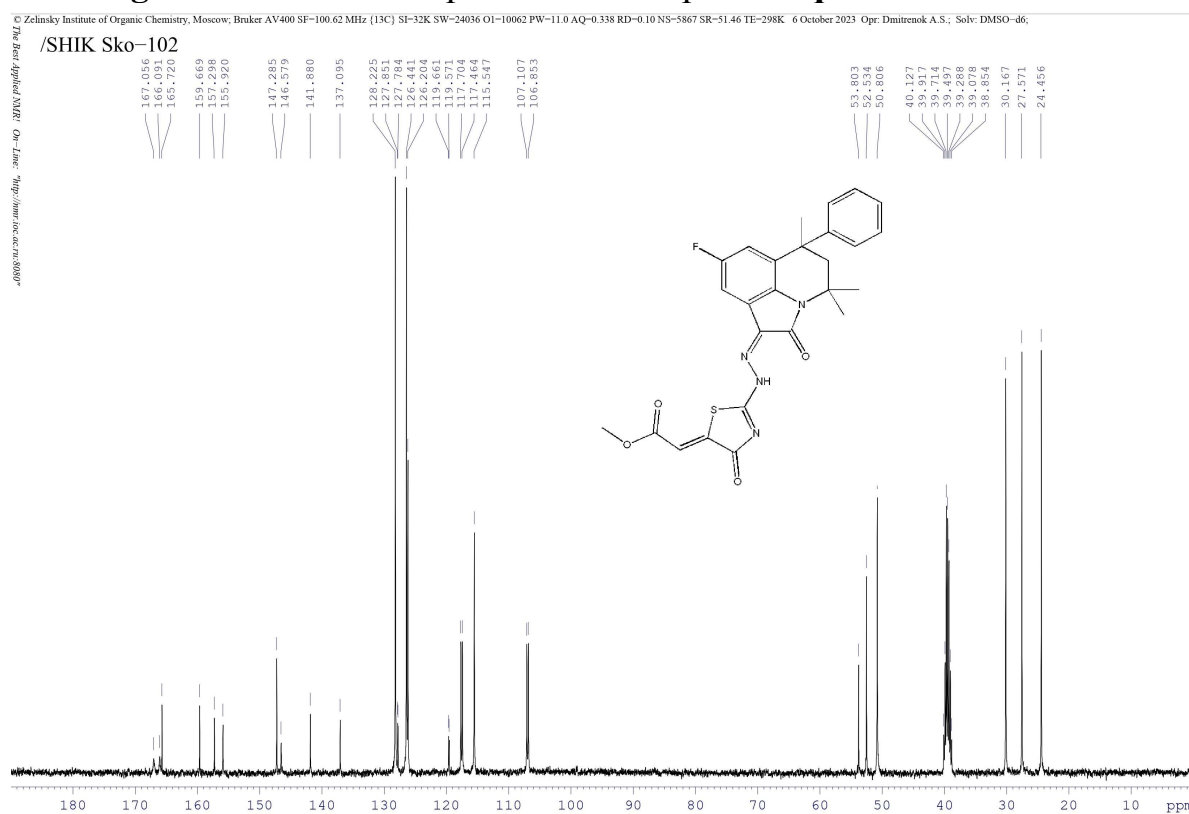

**Figure S50.**  $^{13}\text{C}$  NMR spectrum of compound 3q

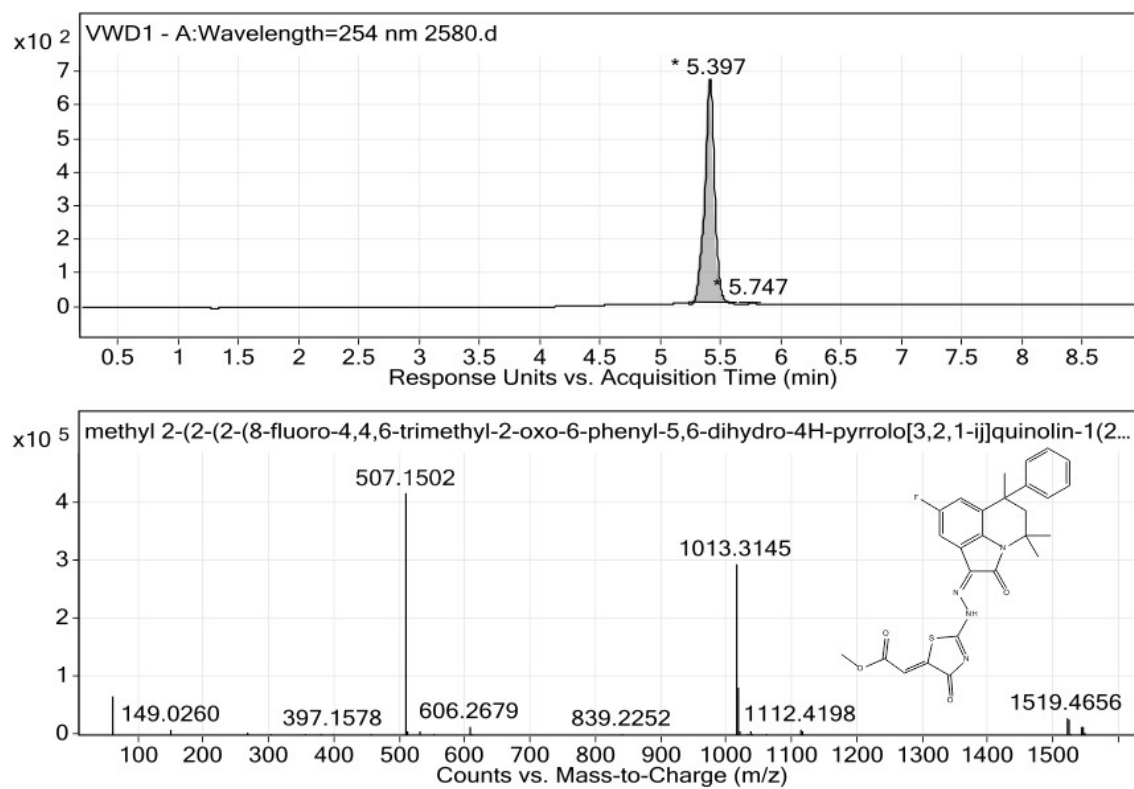

**Figure S51.** Data of HPLC-MS-ESI analysis of **3q**

The dependence of inhibition of factor Xa- and XIa-induced chromogenic substrate hydrolysis on the compound concentration.

**The dependence of inhibition of factor Xa- and XIa-induced chromogenic substrate hydrolysis on the concentration of 3b**

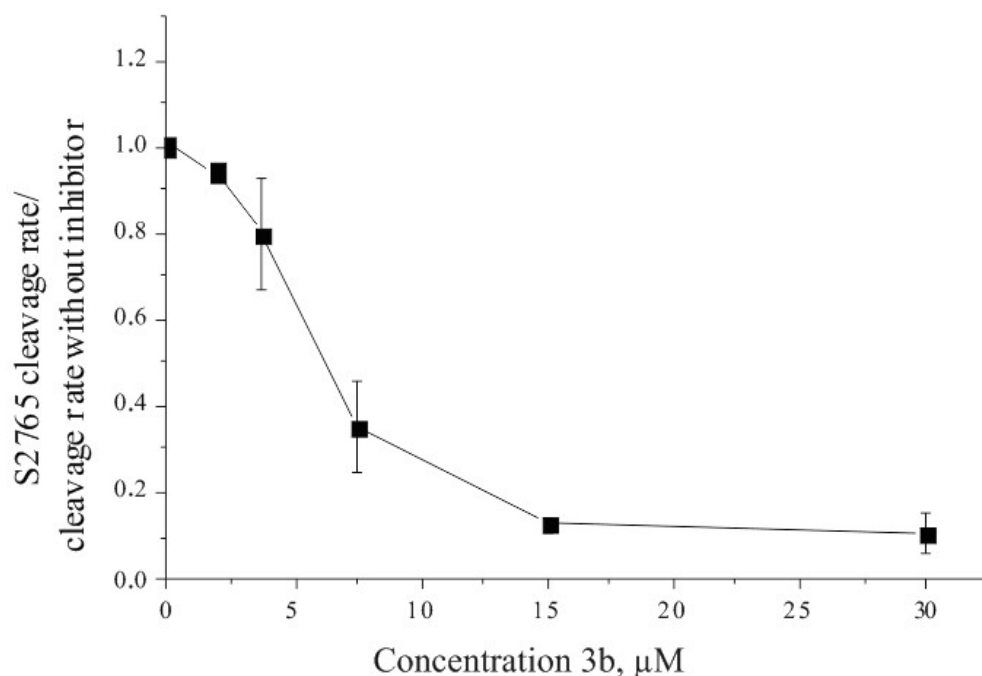

**Figure S52.** The dependence of inhibition of factor Xa-induced chromogenic substrate hydrolysis on the concentration of **3b**

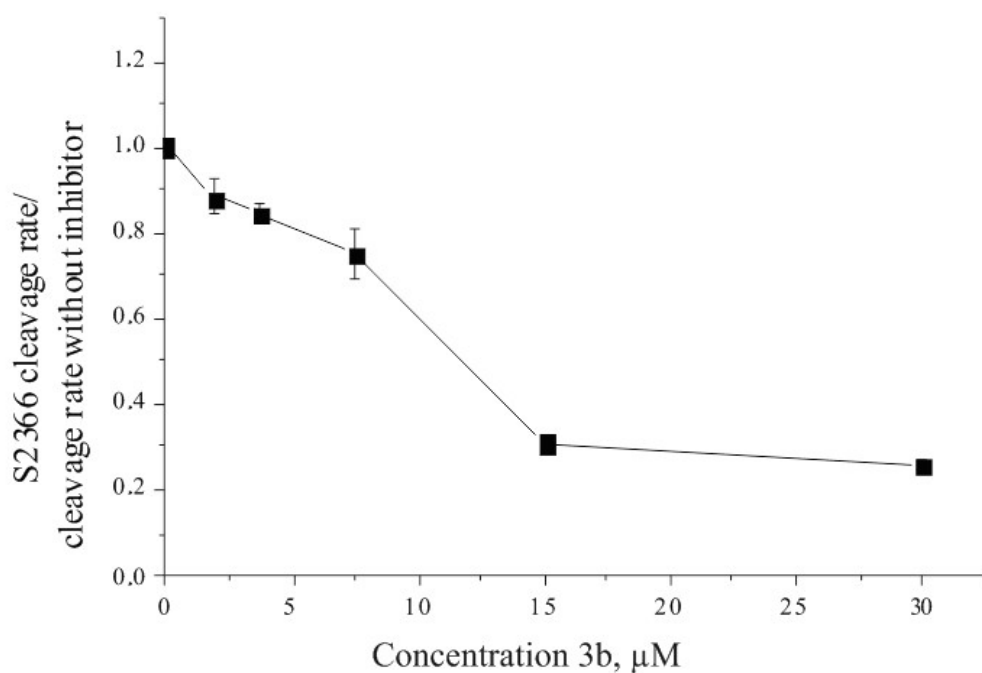

**Figure S53.** The dependence of inhibition of factor XIa-induced chromogenic substrate hydrolysis on the concentration of **3b**

**The dependence of inhibition of factor Xa- and XIa-induced chromogenic substrate hydrolysis on the concentration of 3c**

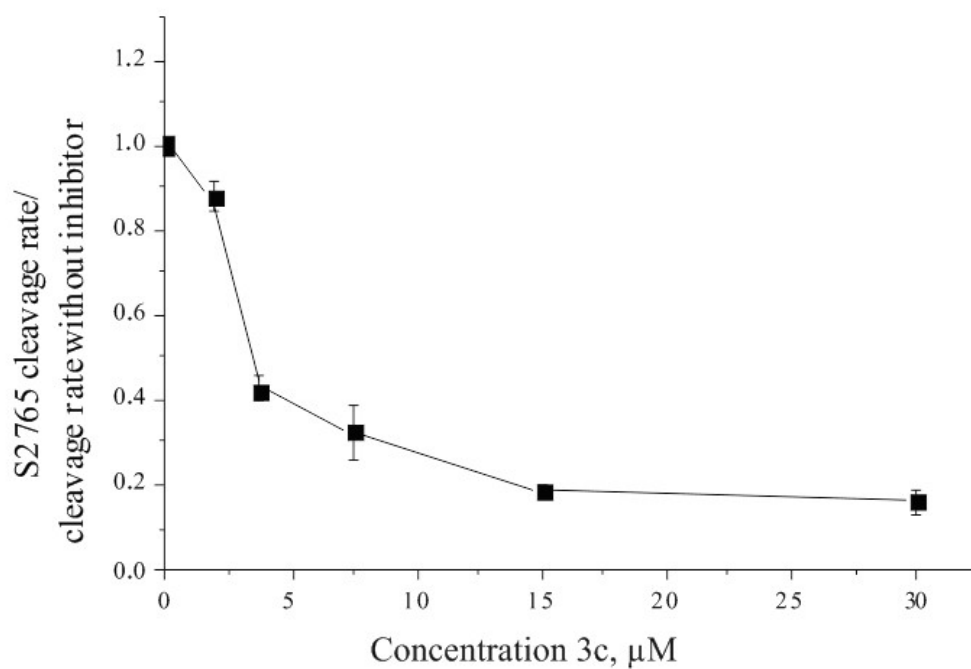

**Figure S54.** The dependence of inhibition of factor Xa-induced chromogenic substrate hydrolysis on the concentration of 3c

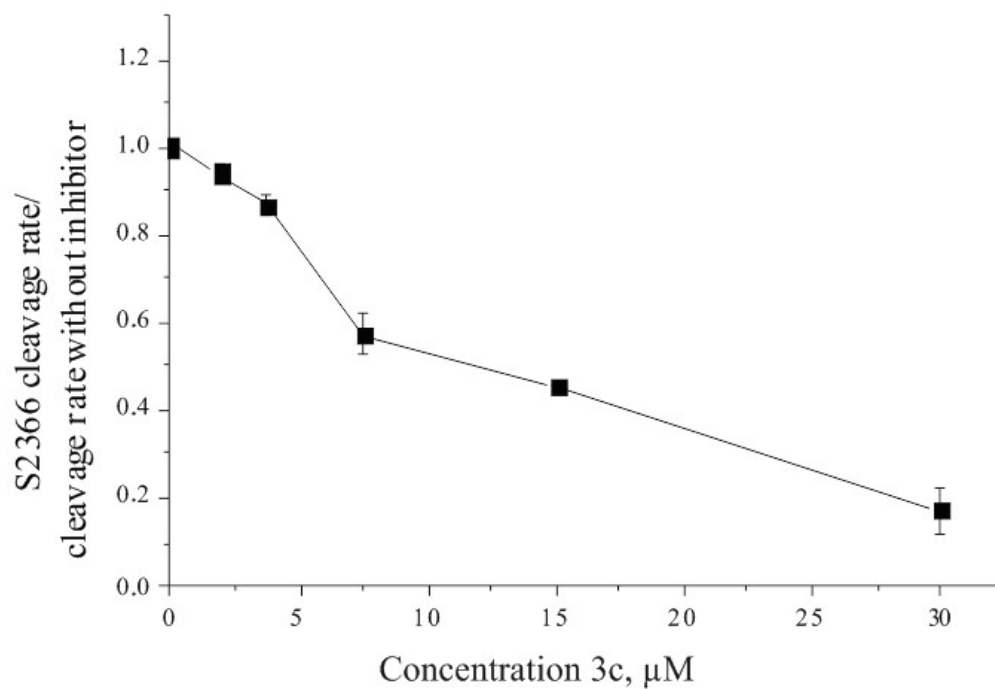

**Figure S55.** The dependence of inhibition of factor XIa-induced chromogenic substrate hydrolysis on the concentration of 3c

**The dependence of inhibition of factor Xa- and XIa-induced chromogenic substrate hydrolysis on the concentration of 3e**

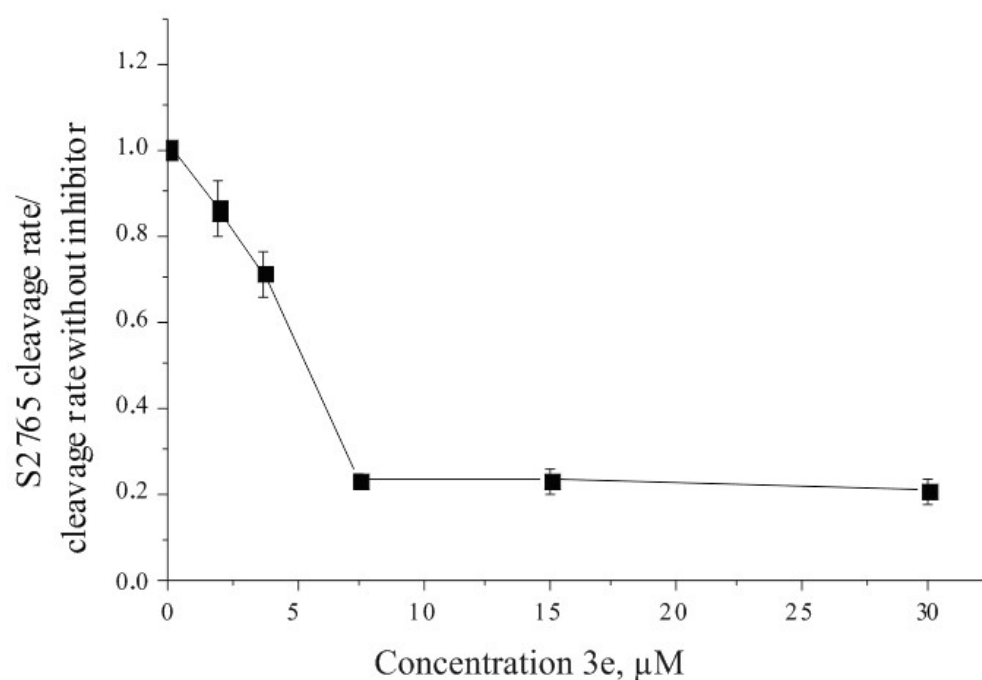

**Figure S56.** The dependence of inhibition of factor Xa-induced chromogenic substrate hydrolysis on the concentration of 3e

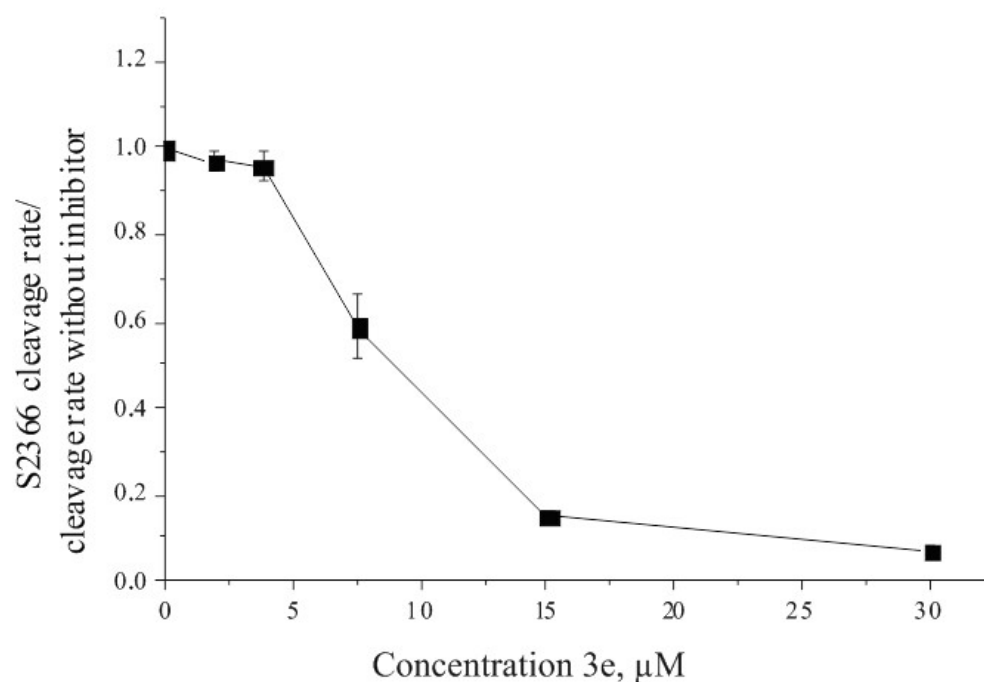

**Figure S57.** The dependence of inhibition of factor XIa-induced chromogenic substrate hydrolysis on the concentration of 3e



**The dependence of inhibition of factor Xa- and XIa-induced chromogenic substrate hydrolysis on the concentration of 3f**

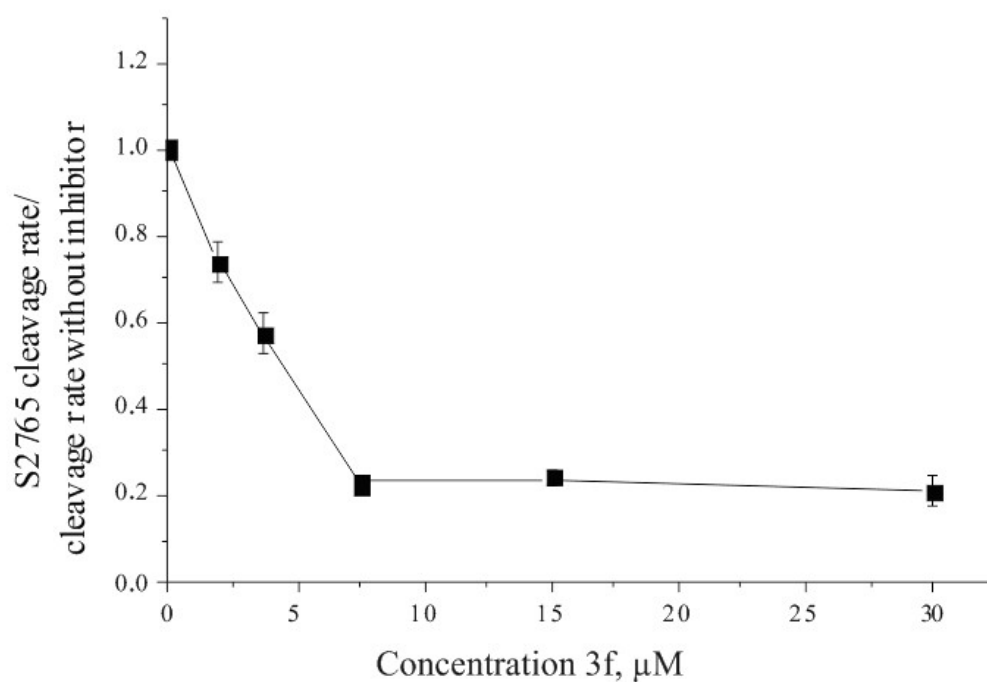

**Figure S58.** The dependence of inhibition of factor Xa-induced chromogenic substrate hydrolysis on the concentration of 3f

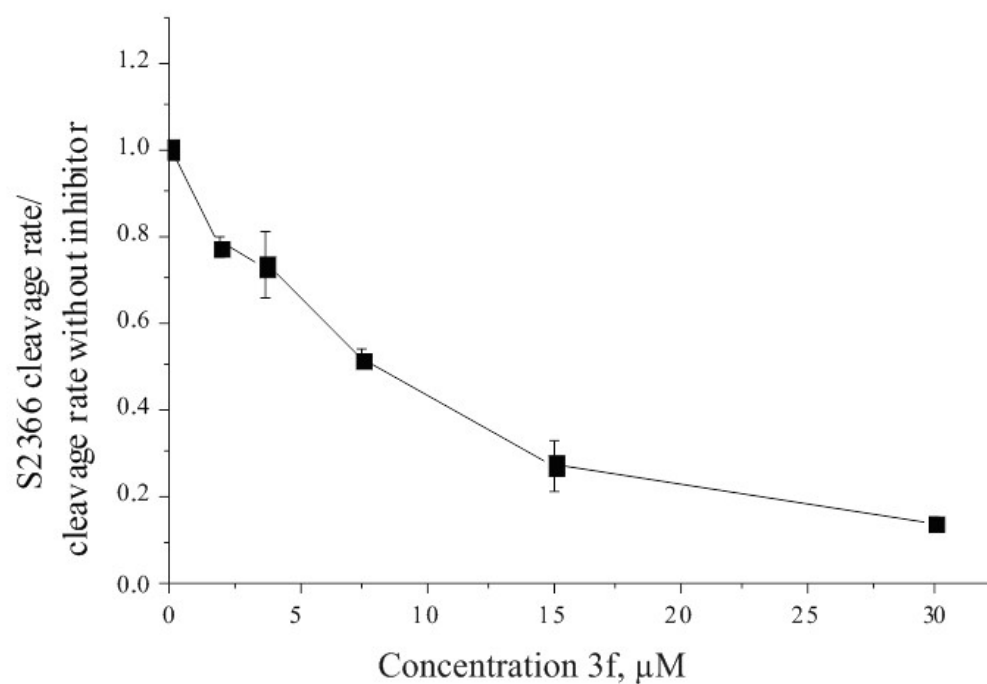

**Figure S59.** The dependence of inhibition of factor XIa-induced chromogenic substrate hydrolysis on the concentration of 3f

**The dependence of inhibition of factor Xa- and XIa-induced chromogenic substrate hydrolysis on the concentration of 3k**

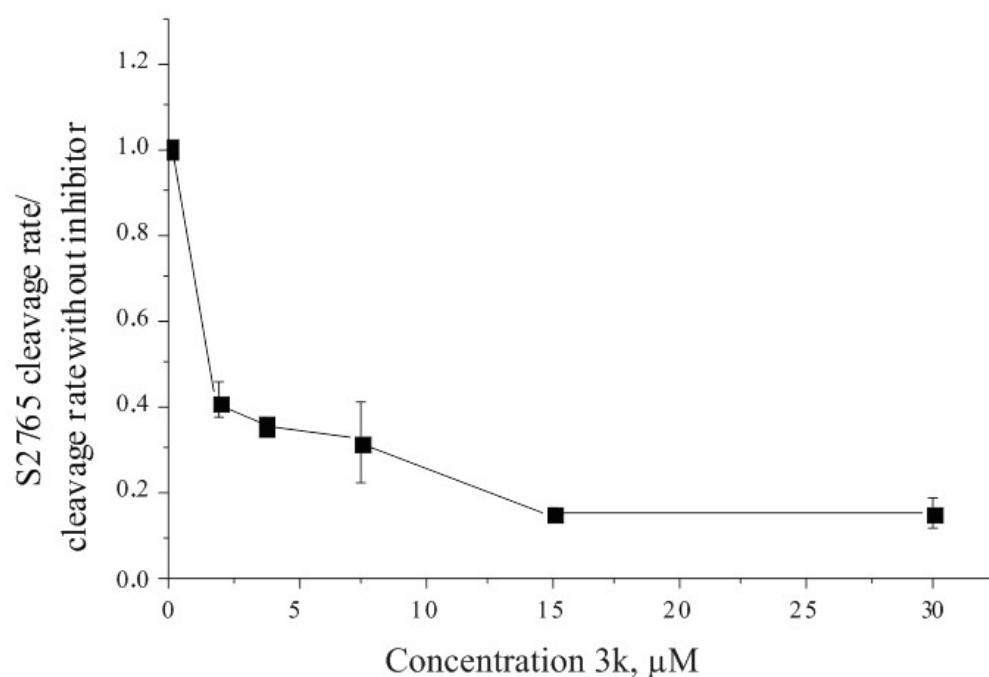

**Figure S60.** The dependence of inhibition of factor Xa-induced chromogenic substrate hydrolysis on the concentration of 3k

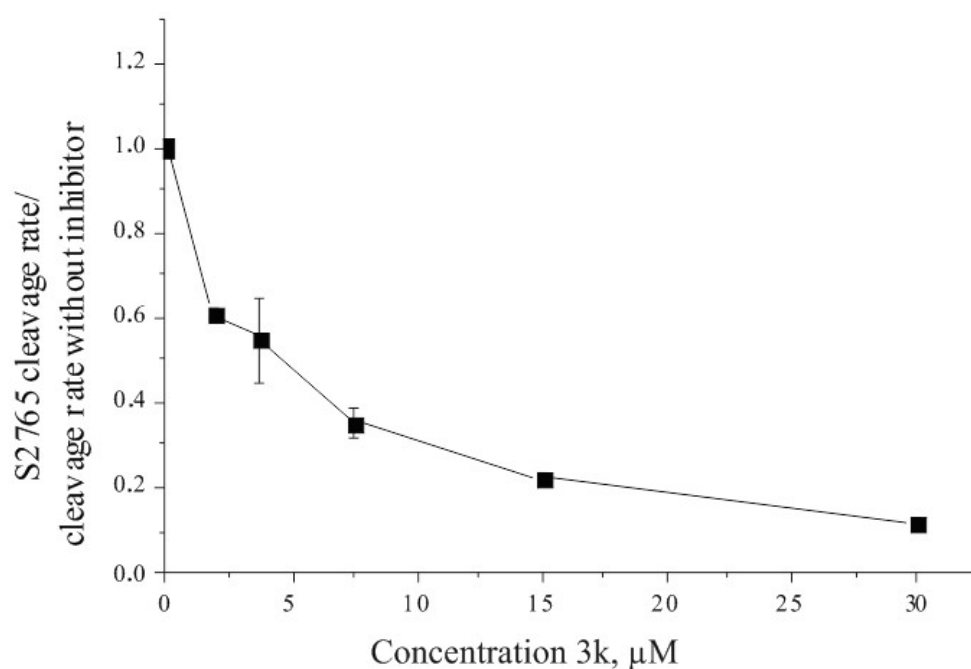

**Figure S61.** The dependence of inhibition of factor XIa-induced chromogenic substrate hydrolysis on the concentration of 3k

**The dependence of inhibition of factor Xa- and XIa-induced chromogenic substrate hydrolysis on the concentration of 3l**

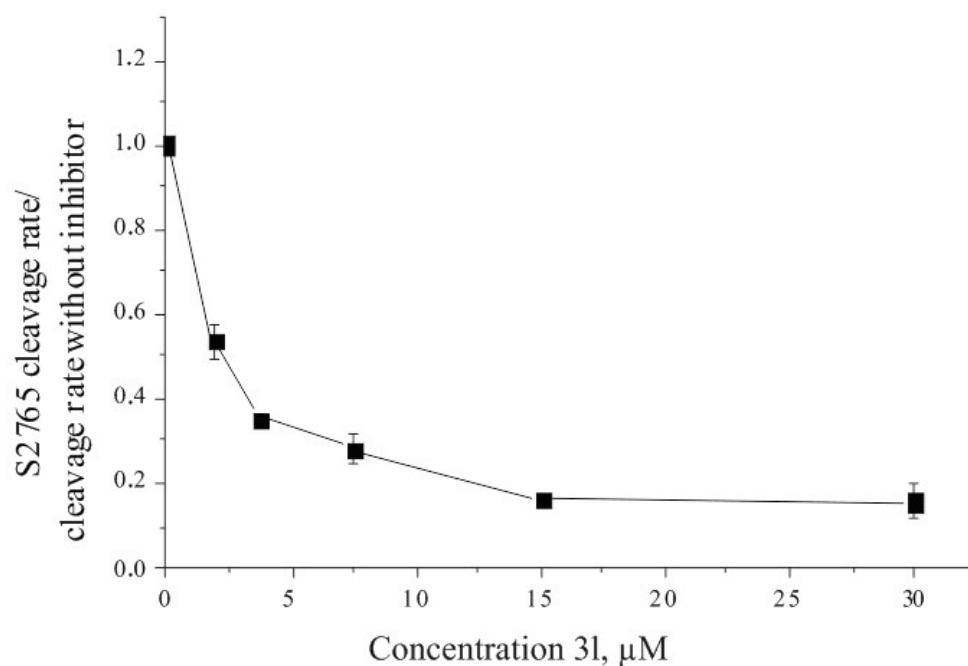

**Figure S62.** The dependence of inhibition of factor Xa-induced chromogenic substrate hydrolysis on the concentration of 3l

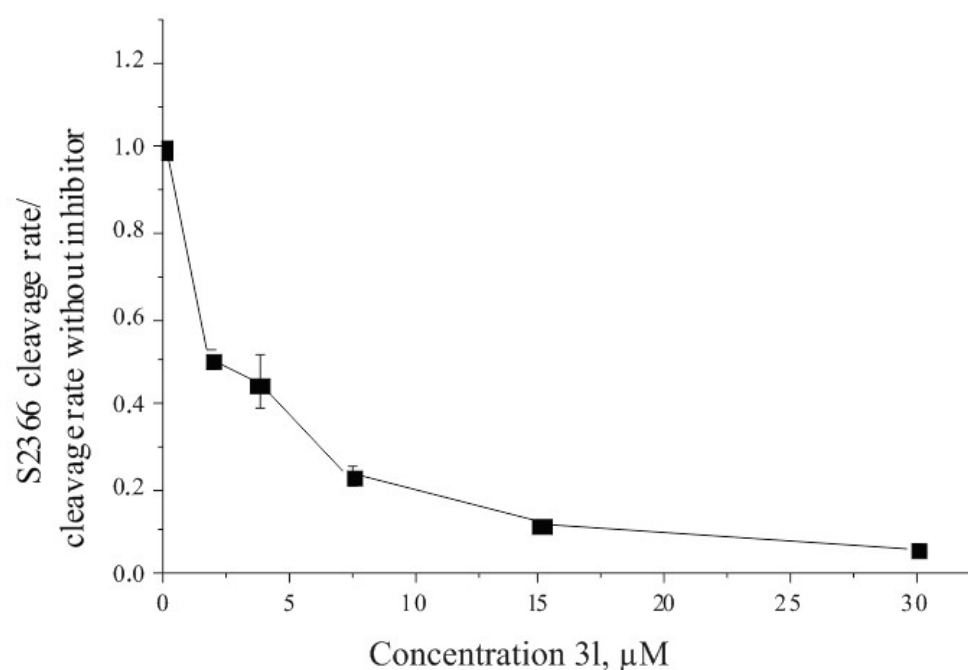

**Figure S63.** The dependence of inhibition of factor XIa-induced chromogenic substrate hydrolysis on the concentration of 3l

**The dependence of inhibition of factor Xa- and XIa-induced chromogenic substrate hydrolysis on the concentration of 3n**

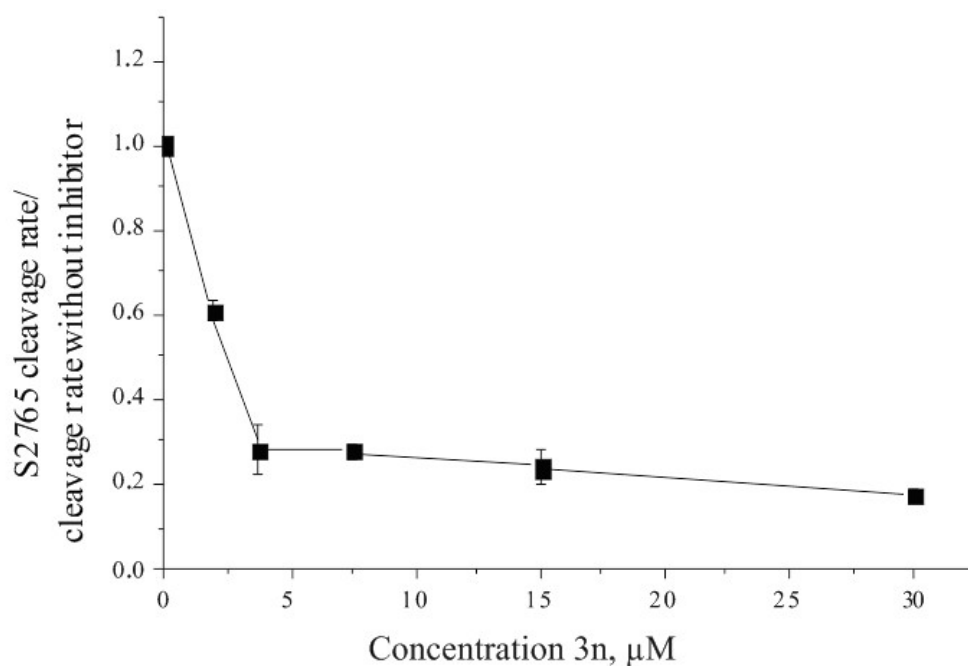

**Figure S64.** The dependence of inhibition of factor Xa-induced chromogenic substrate hydrolysis on the concentration of 3n

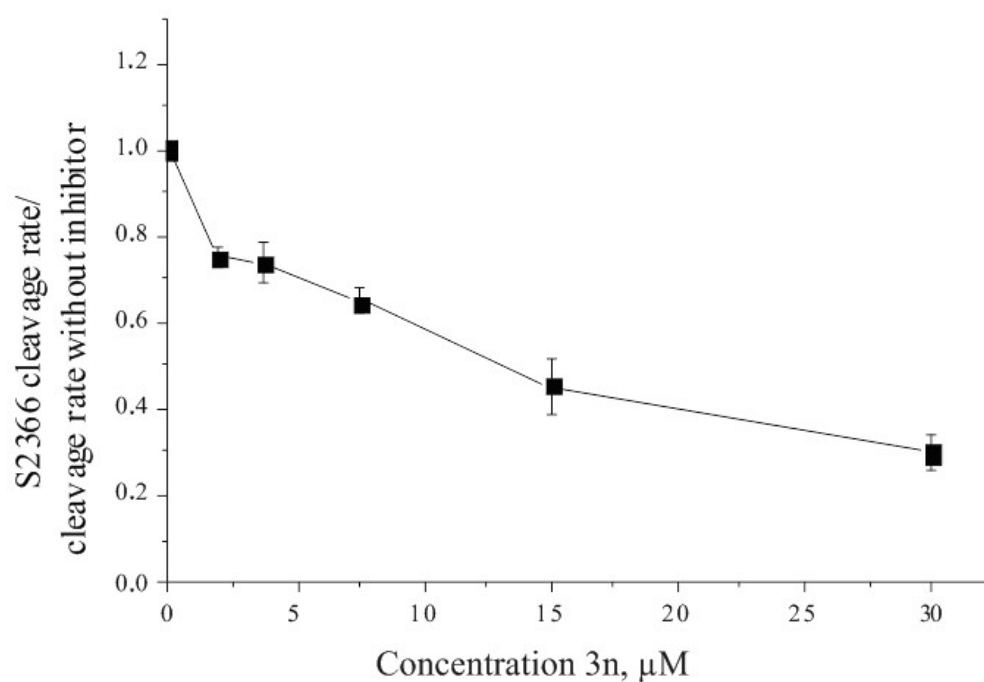

**Figure S65.** The dependence of inhibition of factor XIa-induced chromogenic substrate hydrolysis on the concentration of 3n

**The dependence of inhibition of factor Xa- and XIa-induced chromogenic substrate hydrolysis on the concentration of 3o**

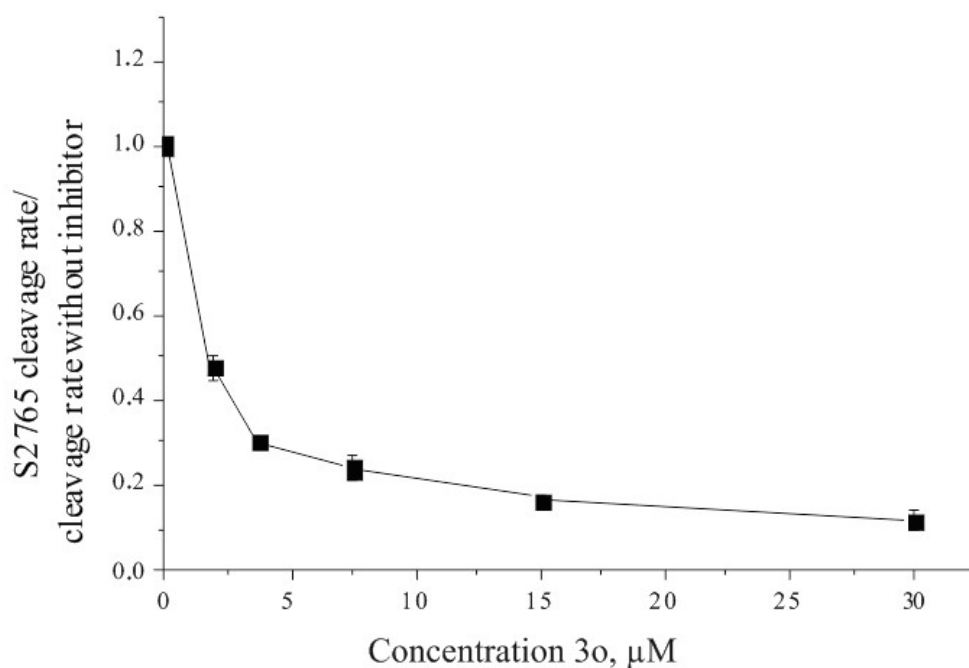

**Figure S66.** The dependence of inhibition of factor Xa-induced chromogenic substrate hydrolysis on the concentration of **3o**

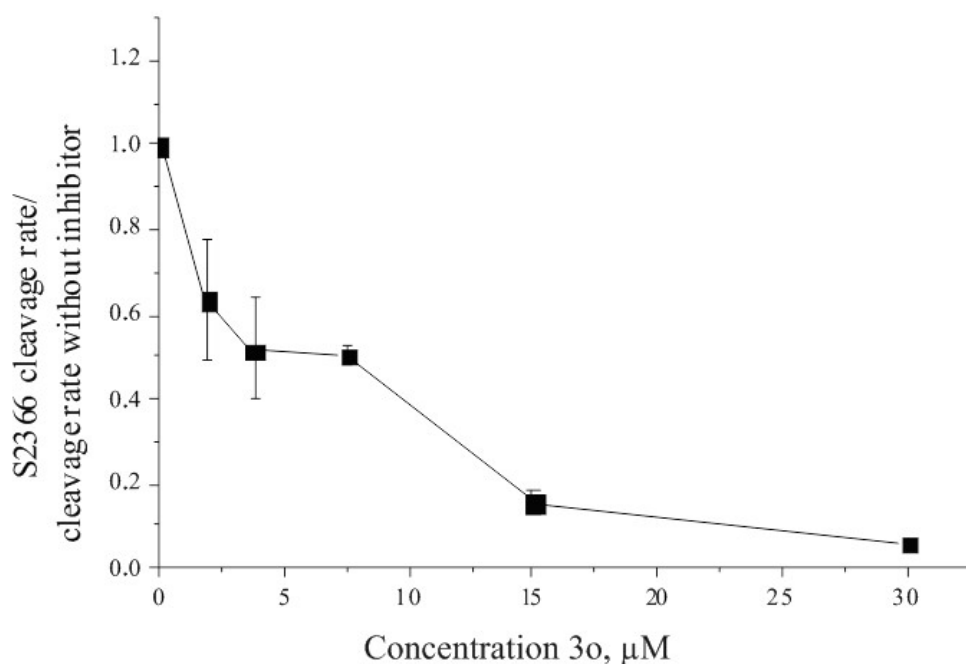

**Figure S67.** The dependence of inhibition of factor XIa-induced chromogenic substrate hydrolysis on the concentration of **3o**

**The dependence of inhibition of factor Xa- and XIa-induced chromogenic substrate hydrolysis on the concentration of 3p**

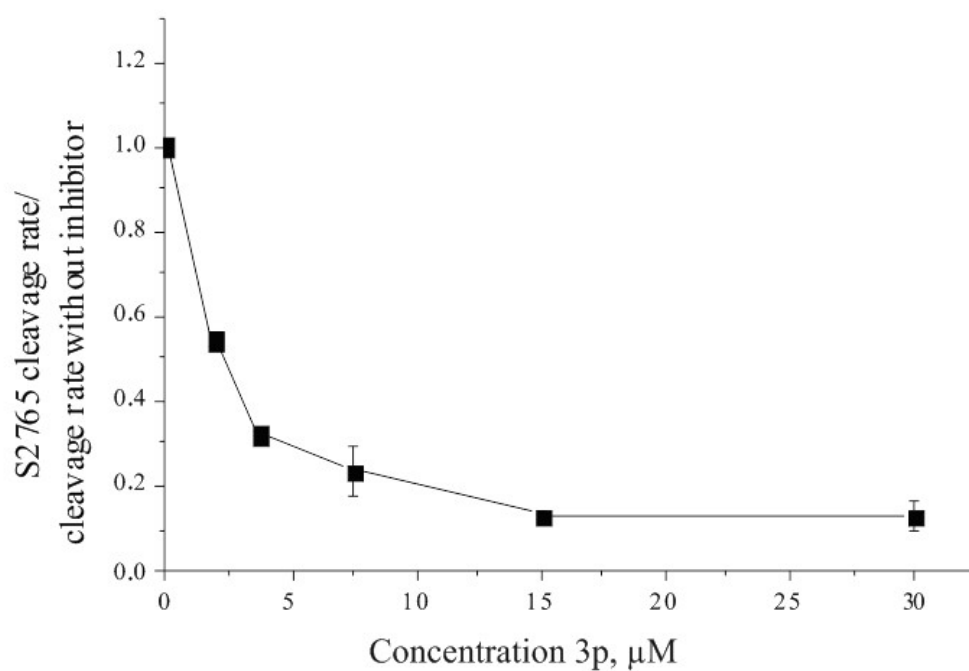

**Figure S68.** The dependence of inhibition of factor Xa-induced chromogenic substrate hydrolysis on the concentration of **3p**

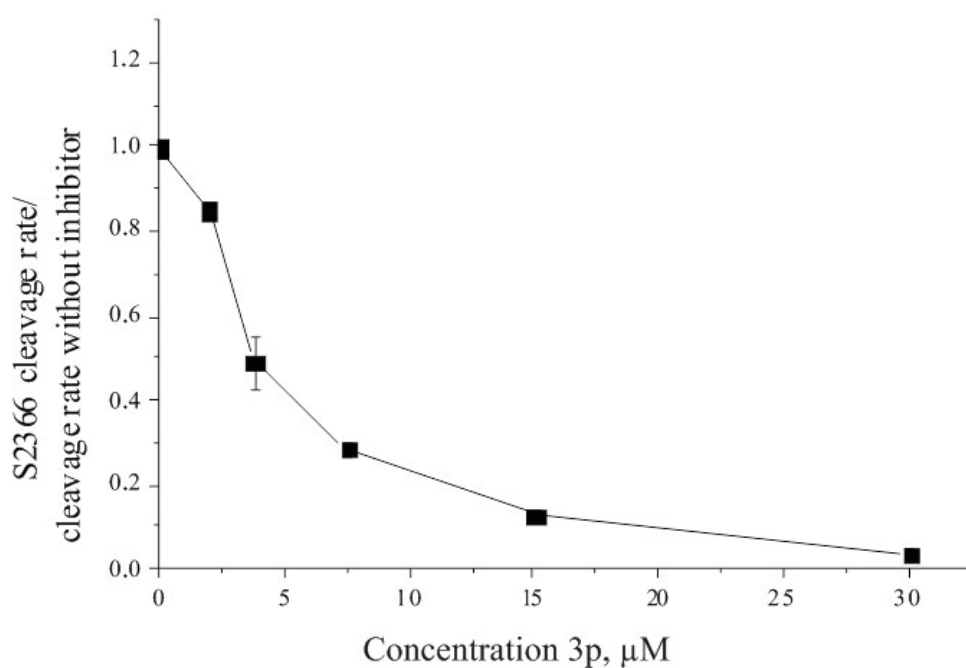

**Figure S69.** The dependence of inhibition of factor XIa-induced chromogenic substrate hydrolysis on the concentration of **3p**

LCMS analysis of the reaction mass after 1 h of interaction of compound 1b with thiosemicarbazide to obtain 2b

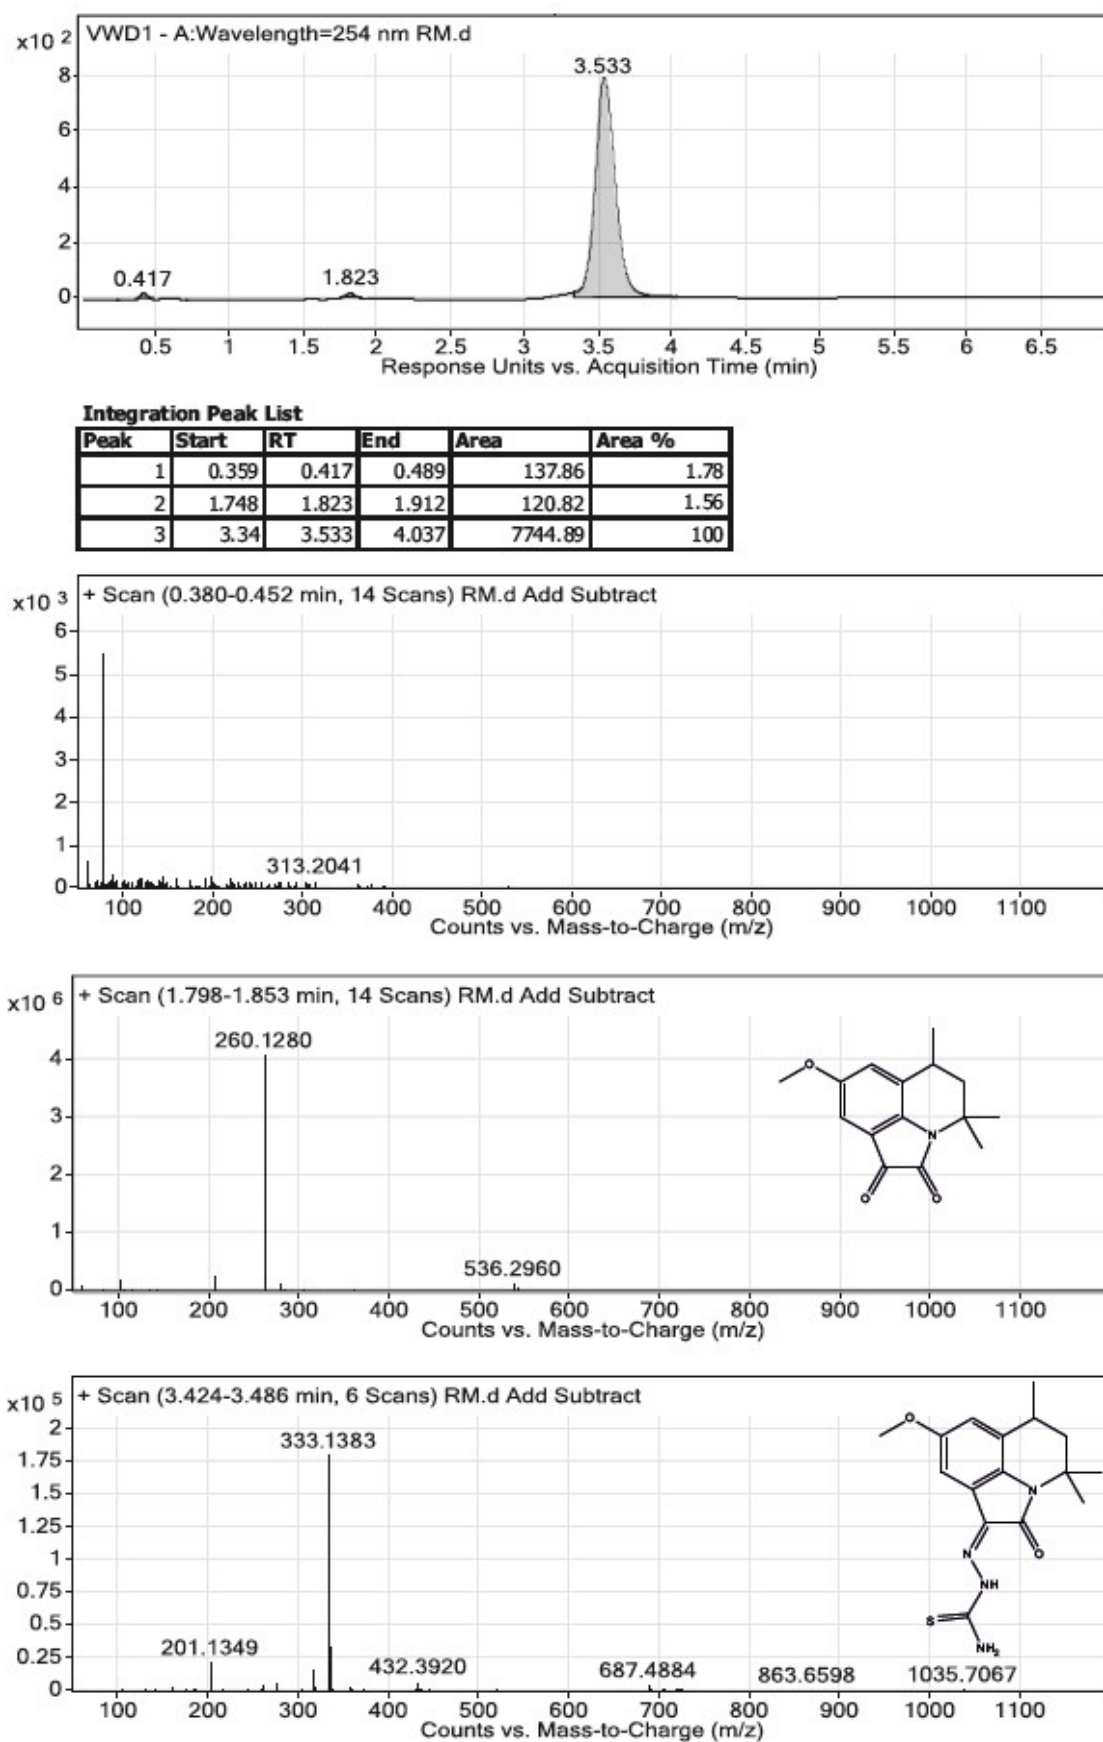

**Figure S70.** LCMS analysis of the reaction mass after 1 h of interaction of compound 1b with thiosemicarbazide to obtain 2b
